# Supplementary material for: Employing fingerprinting of medicinal plants by means of LC-MS and machine learning for species identification task
Source: PubMed Central journal article supplement (PMC6243014; doi:10.1038/s41598-018-35399-z), 2018-11-19
Supplement: 41598_2018_35399_MOESM1_ESM.pdf [file 41598_2018_35399_MOESM1_ESM.pdf]

# Employing fingerprinting of medicinal plants by means of LC-MS and machine learning for species identification task

Pavel Kharyuk, Dmitry Nazarenko, Ivan Oseledets, Igor Rodin, Oleg Shpigun, Andrey Tsitsilin, Mikhail Lavrentyev

## Contents

|          |                                                                             |           |
|----------|-----------------------------------------------------------------------------|-----------|
| <b>1</b> | <b>Confusion matrices</b>                                                   | <b>1</b>  |
| <b>2</b> | <b>Top5 predictions</b>                                                     | <b>14</b> |
| <b>3</b> | <b>Hierarchical clustering analysis (HCA)</b>                               | <b>20</b> |
| <b>4</b> | <b>Sparse non-negative components</b>                                       | <b>21</b> |
| <b>5</b> | <b>Autoencoder: structure, t-SNE plots and selection of last layer size</b> | <b>24</b> |
| <b>6</b> | <b>Dataset</b>                                                              | <b>27</b> |
| <b>7</b> | <b>Confusion matrices for prediction of plant parts</b>                     | <b>29</b> |
| <b>8</b> | <b>Github repository structure.</b>                                         | <b>32</b> |

## 1 Confusion matrices

In this section we provide confusion matrices measured on test1 part as mean and median of 5 times repeated 5-fold cross validation (25 runs in total). Columns: predicted labels; rows: true labels.

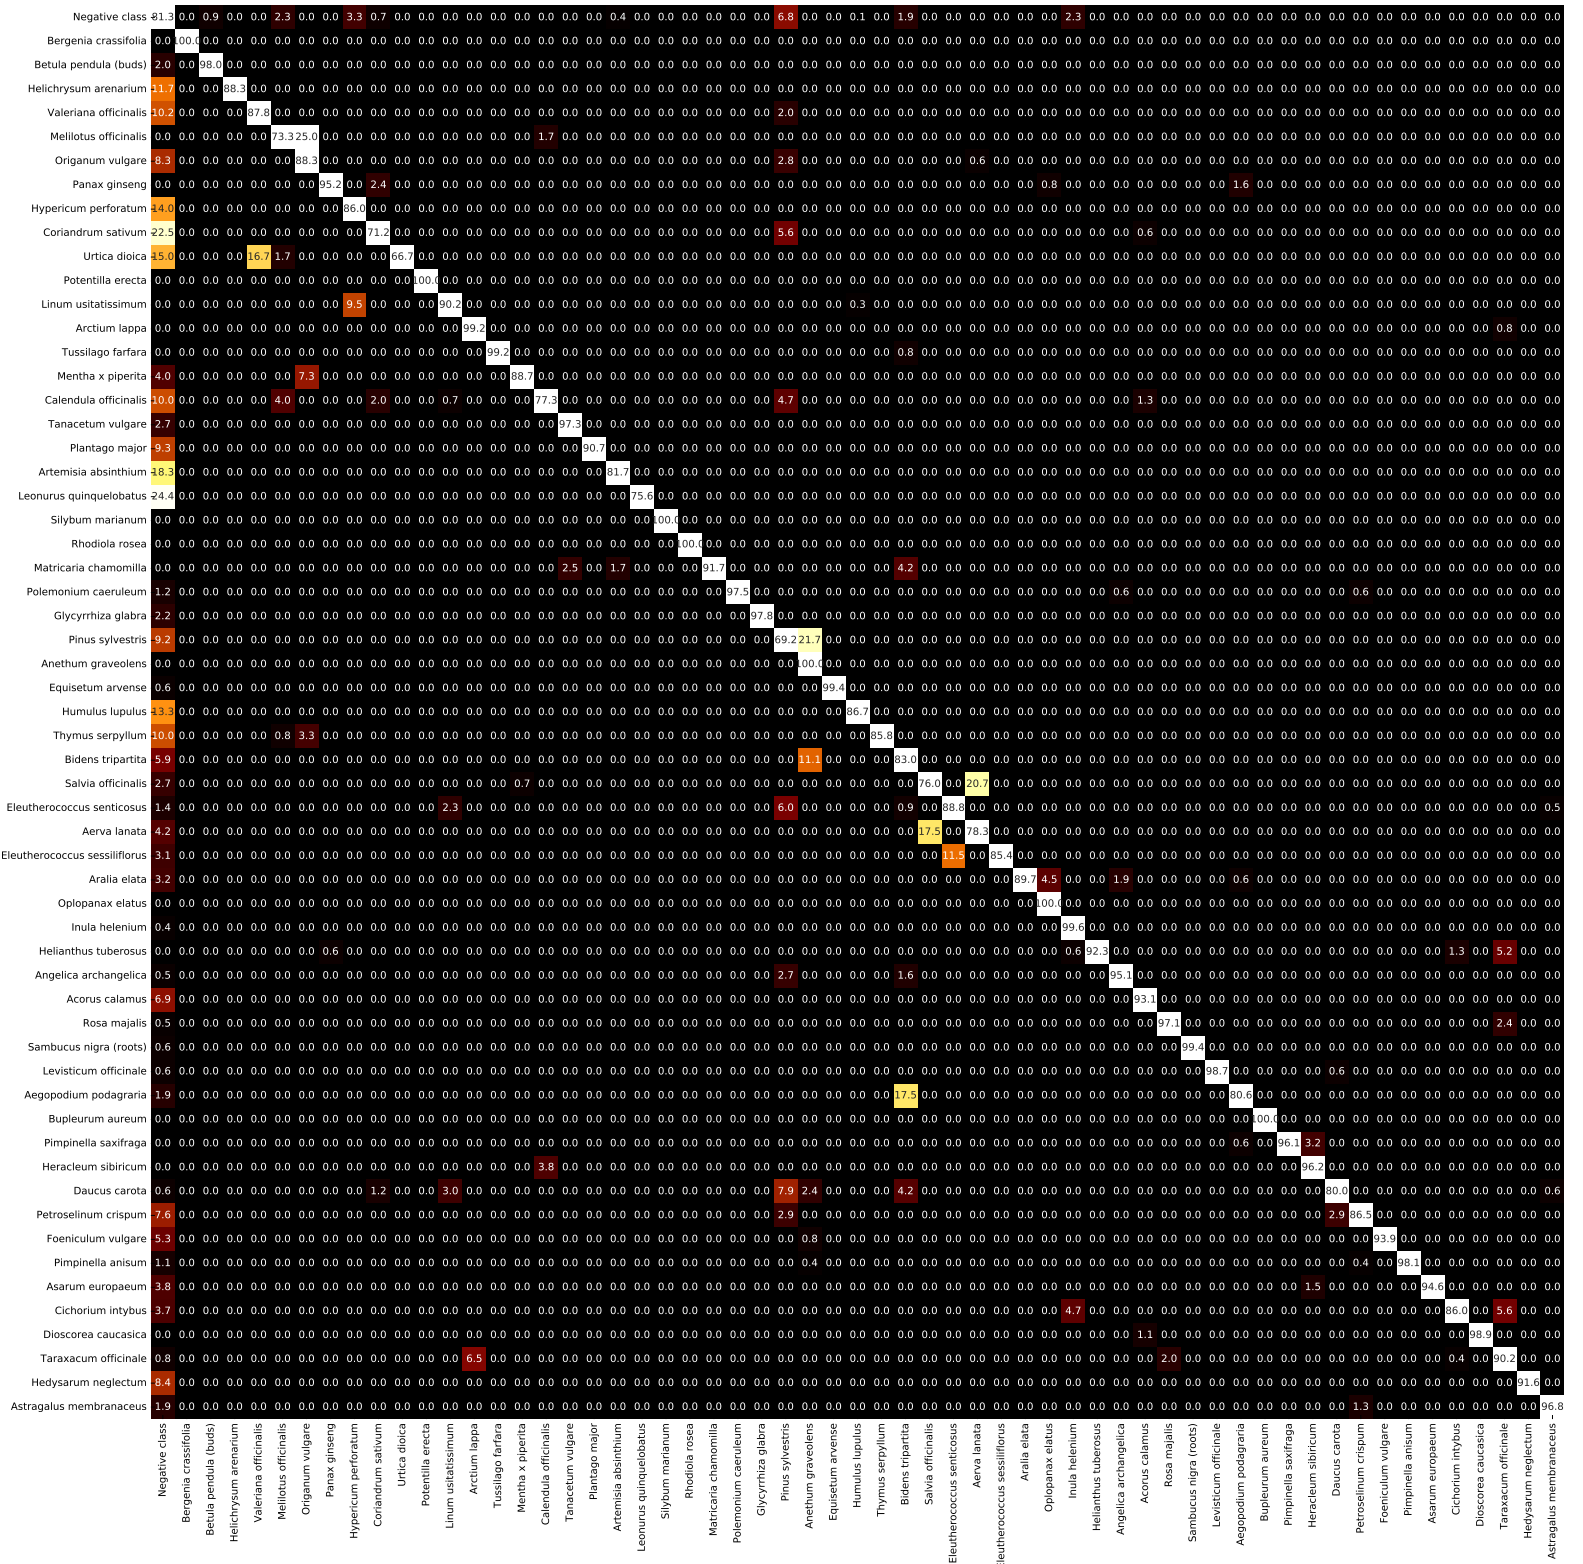

Figure S1.1(a): Mean confusion matrix for Large discrete Bayesian Network

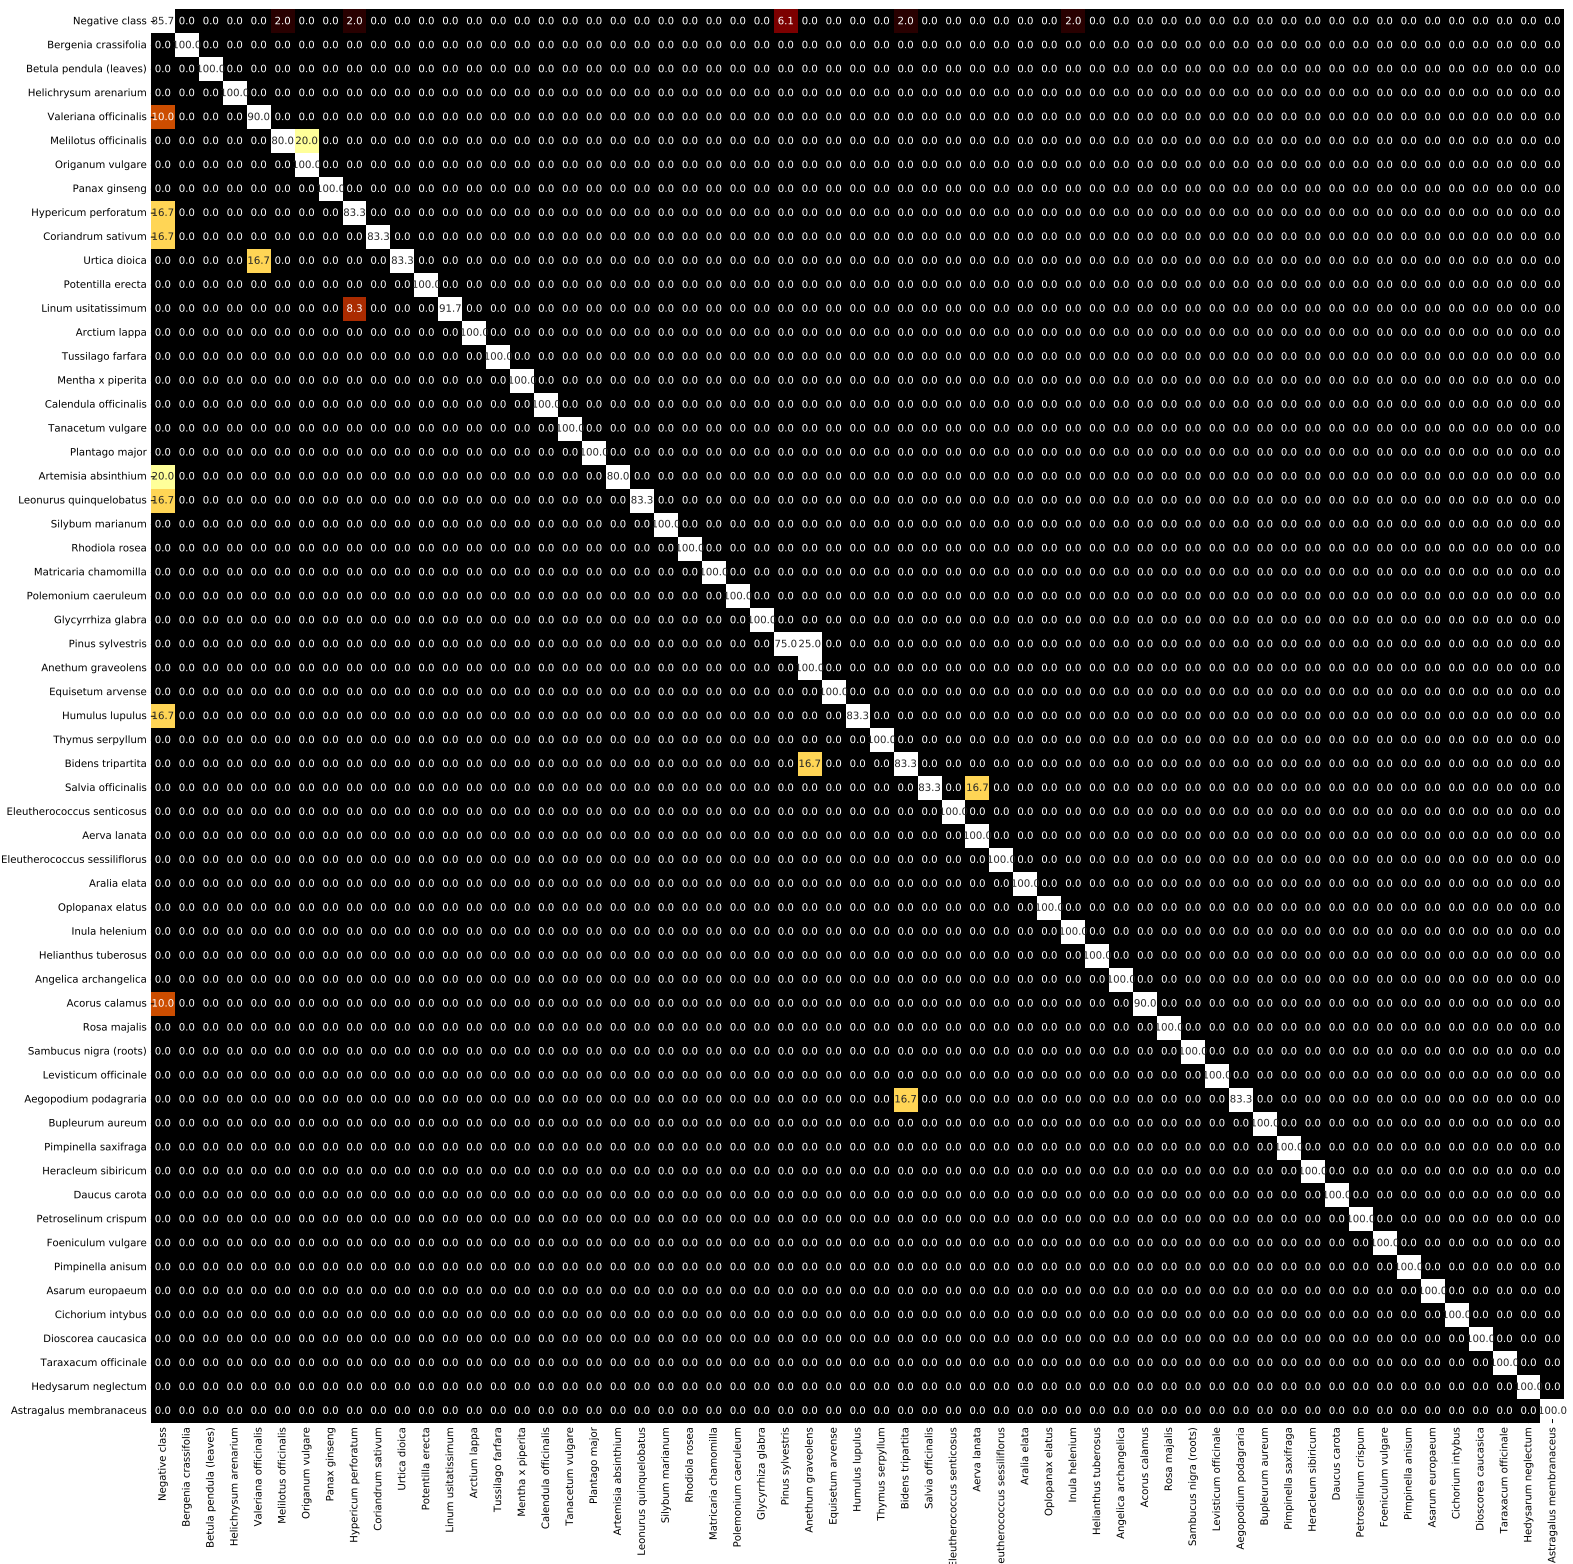

Figure S1.1(b): Median confusion matrix for Large discrete Bayesian Network

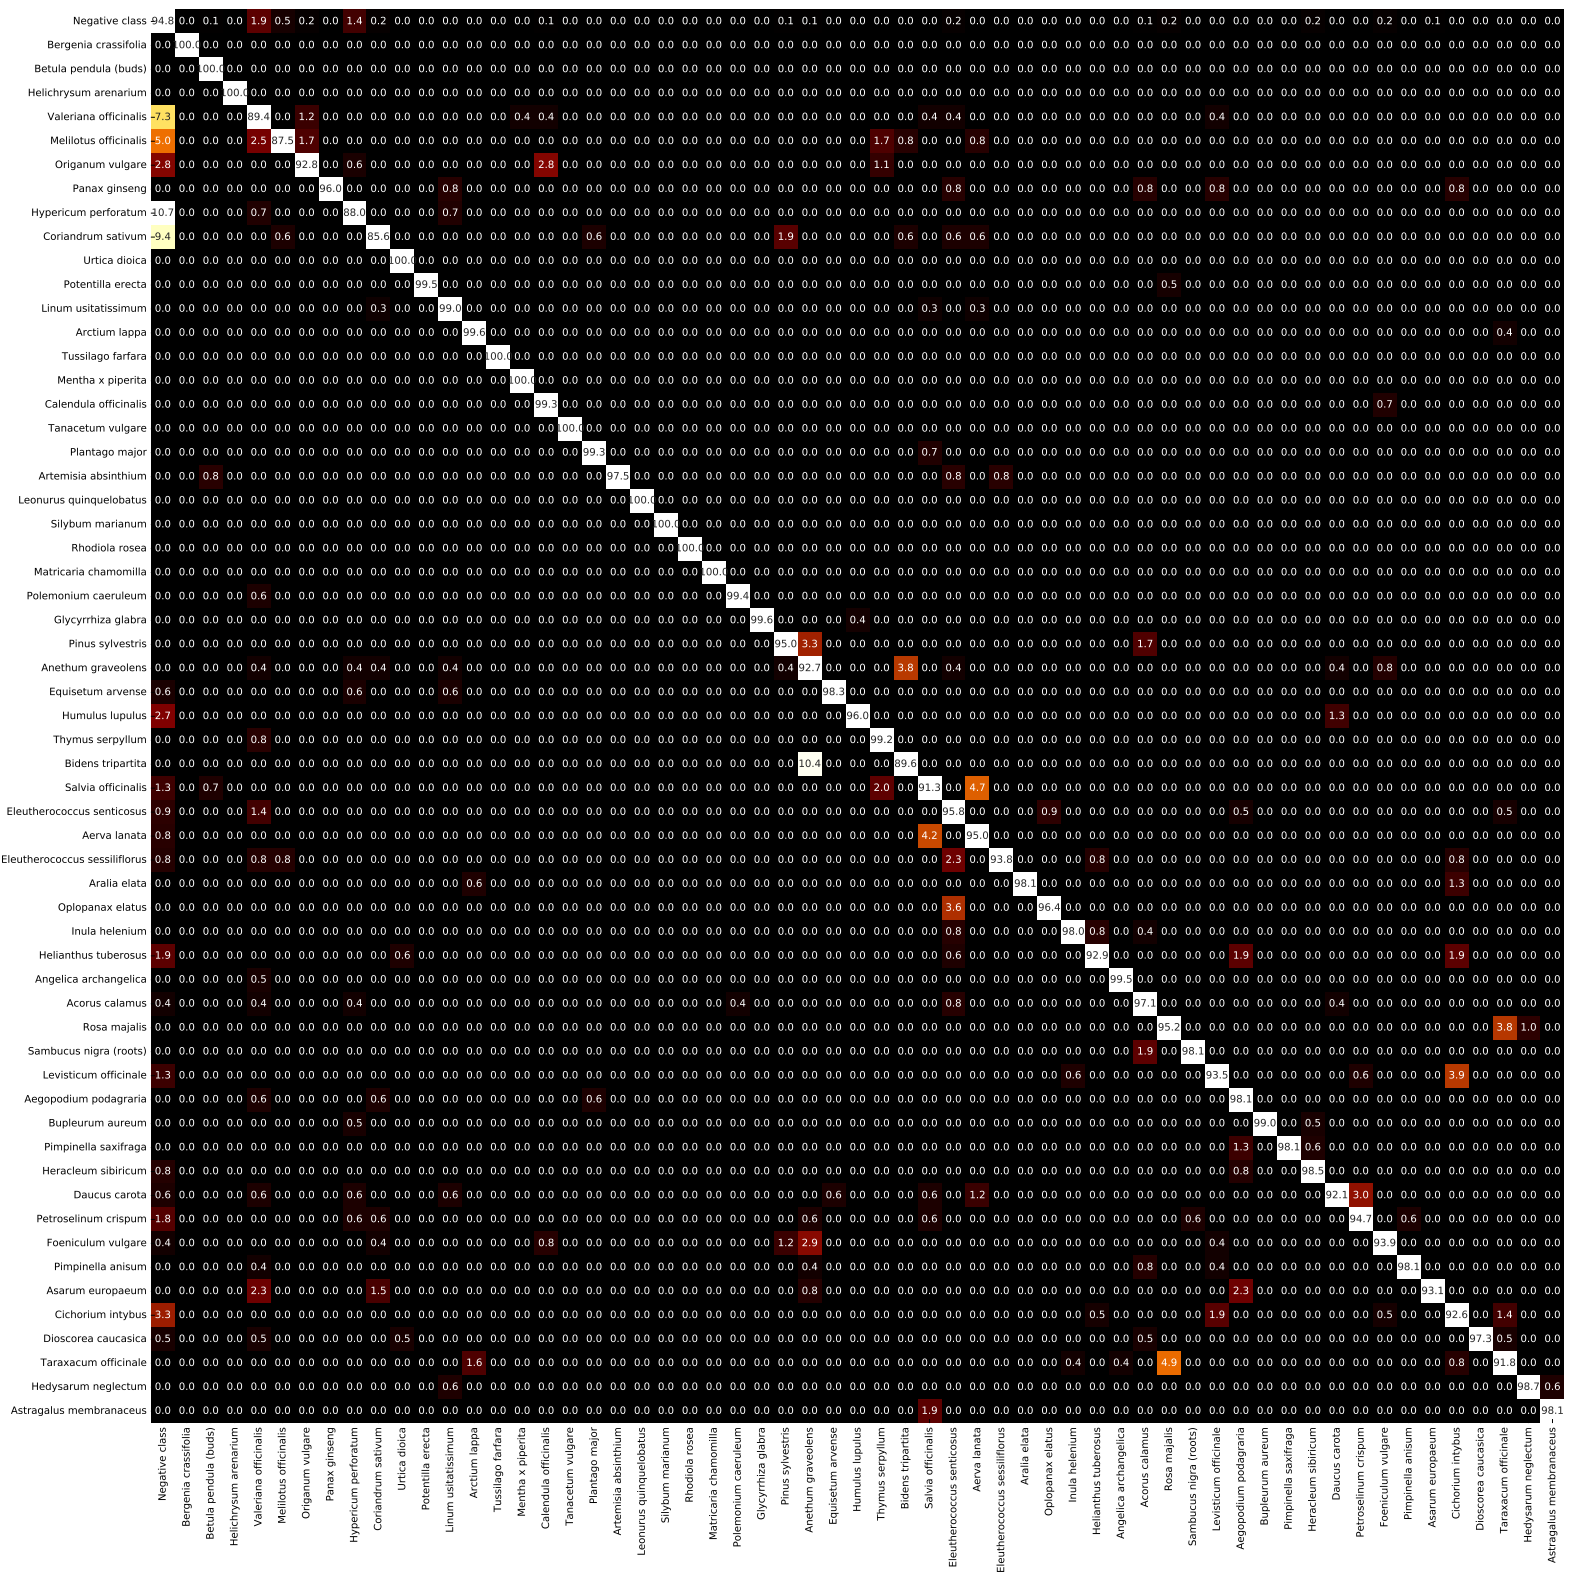

Figure S1.1(c): Mean confusion matrix for Logistic Regression trained on auto-encoded feature space

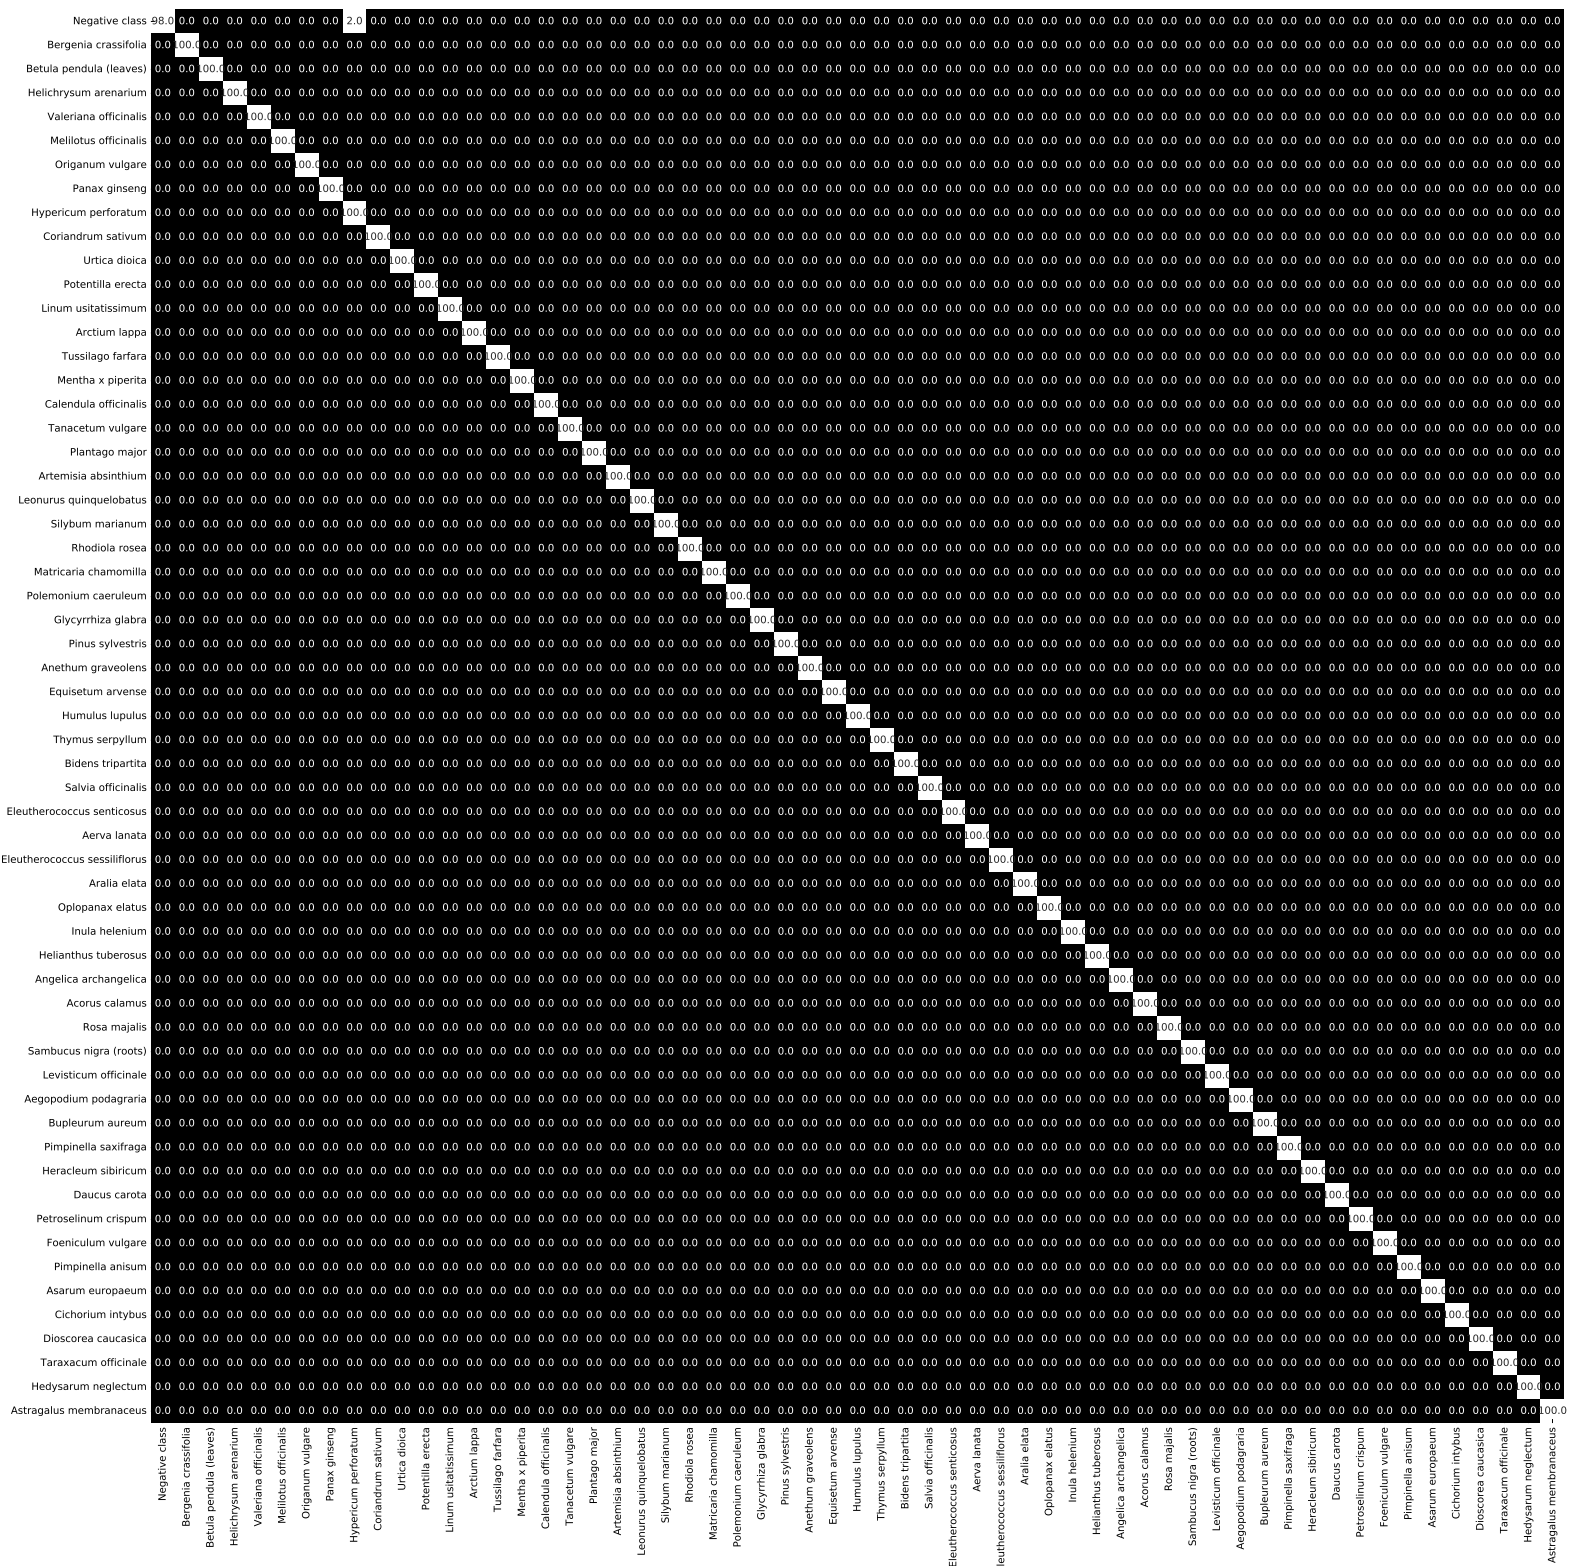

Figure S1.1(d): Median confusion matrix for Logistic Regression trained on autoencoded feature space

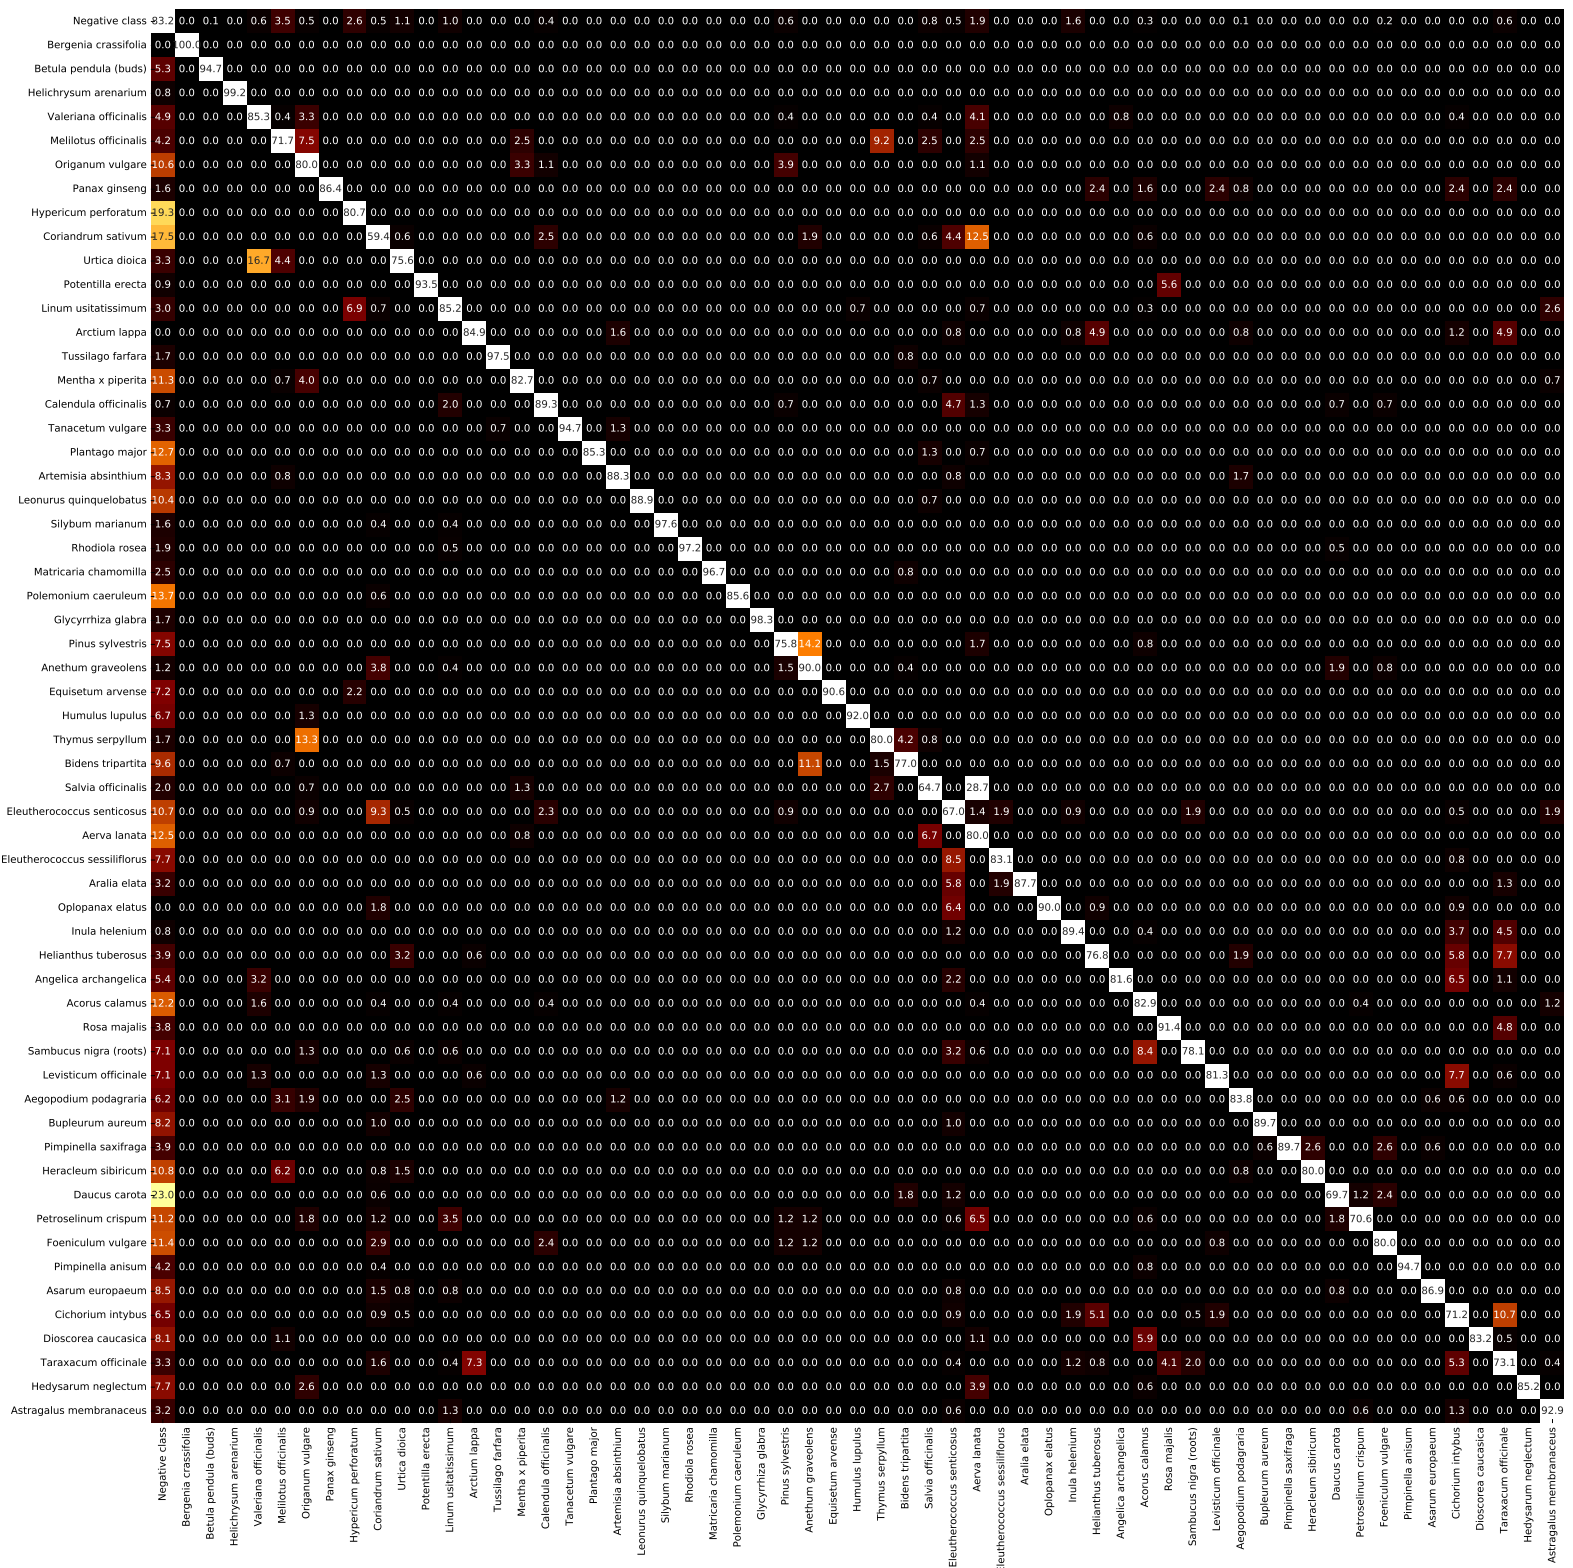

Figure S1.1(e): Mean confusion matrix for Naive Bayes classifier trained on autoencoded feature space





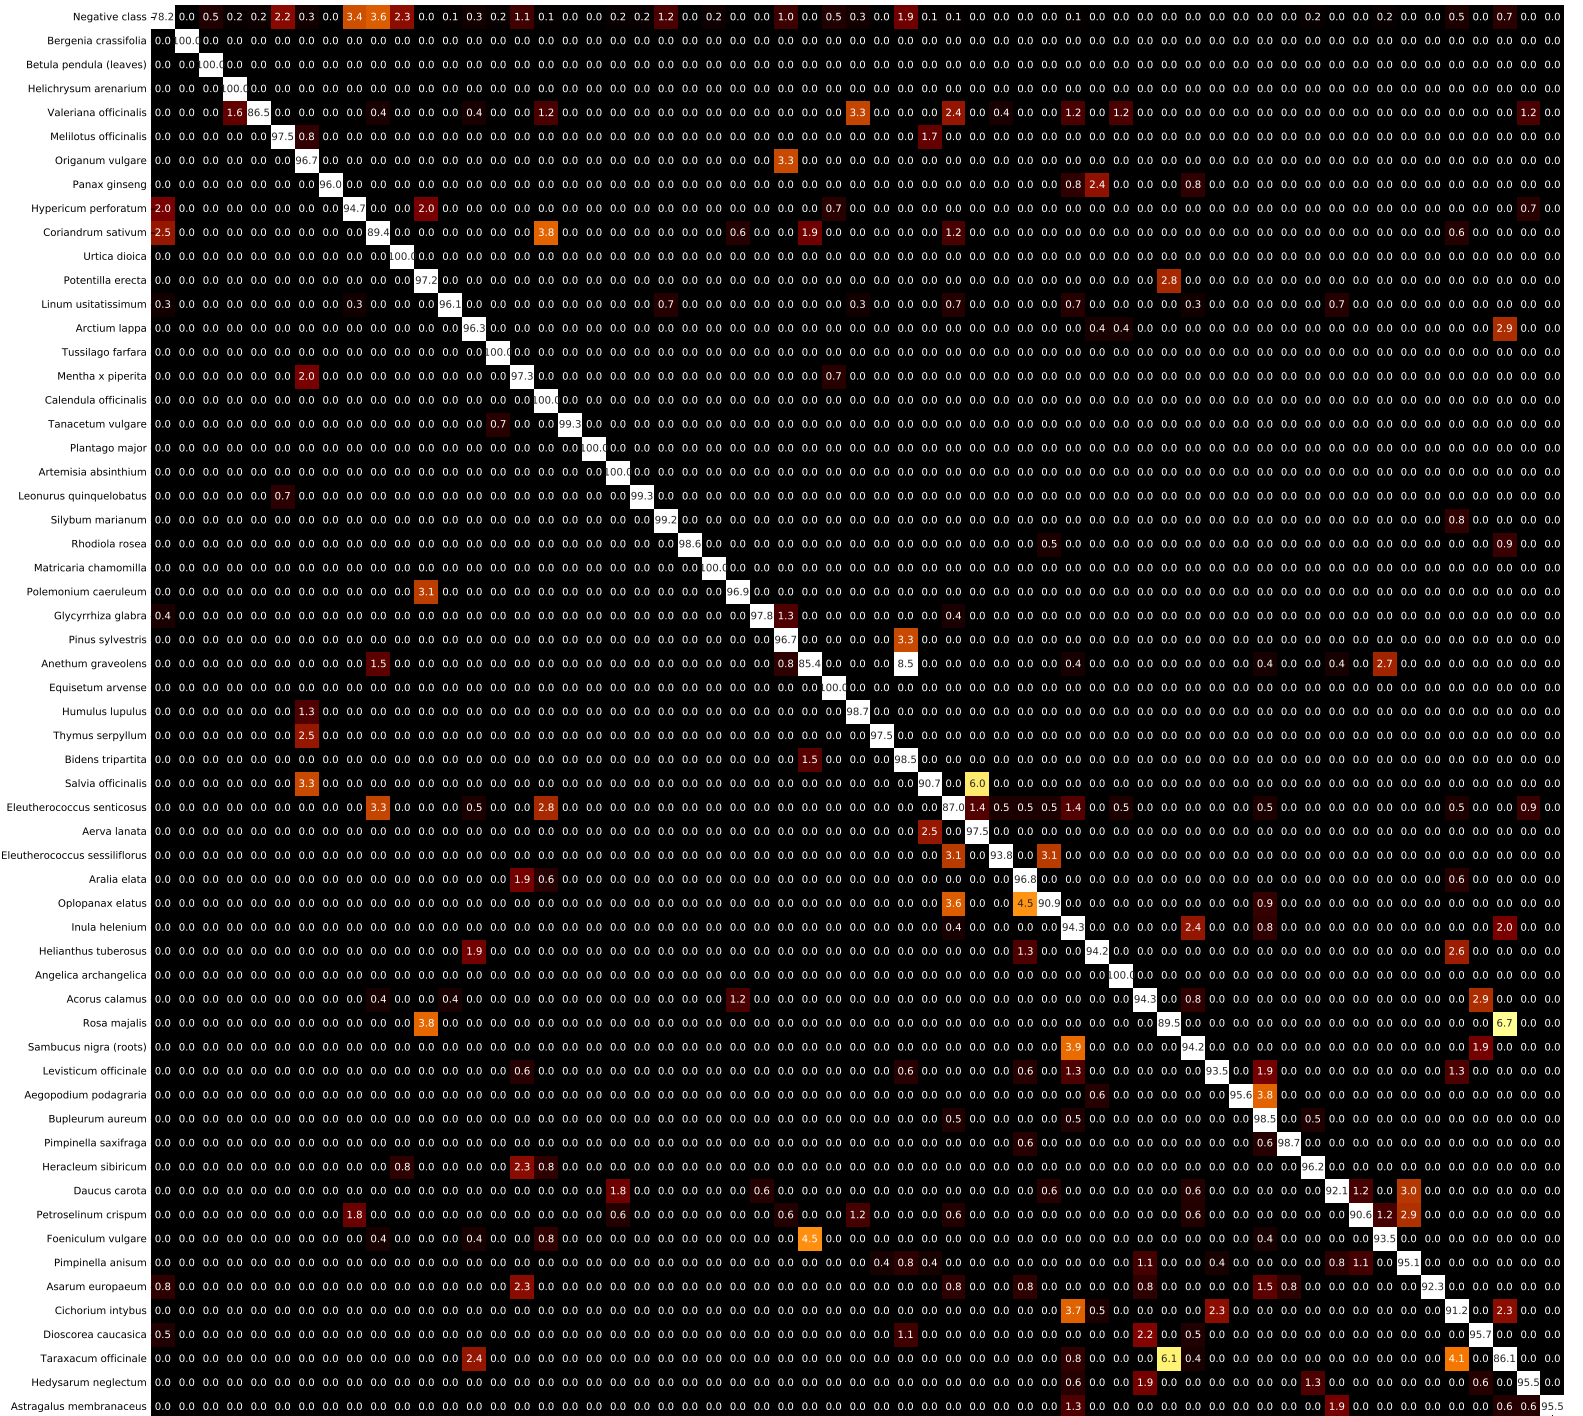

Figure S1.1(g): Mean confusion matrix for sparse non-negative Tucker decomposition based classifier (with principal angle)





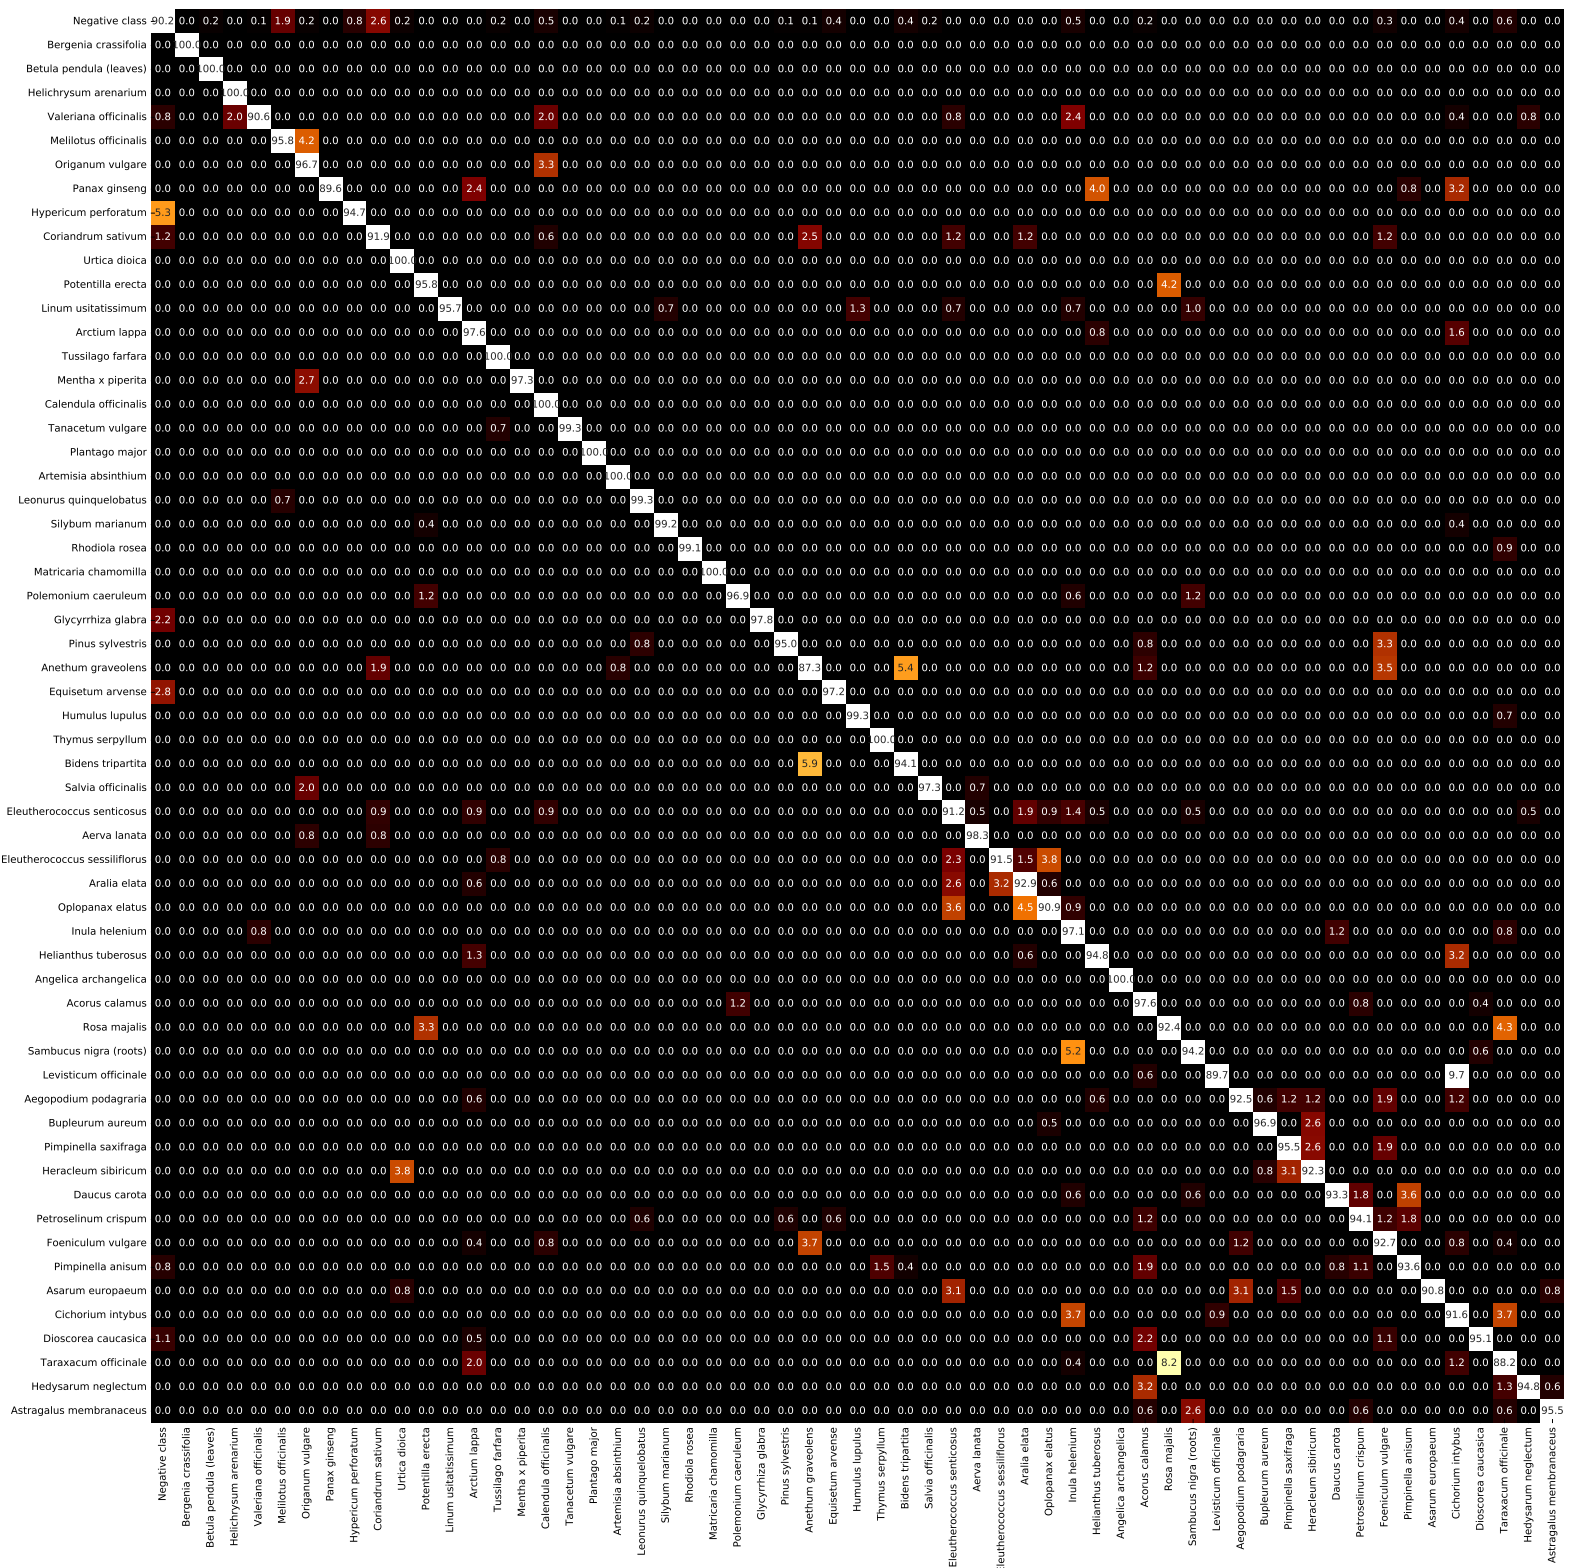

Figure S1.1(i): Mean confusion matrix for sparse non-negative matrix factorization based classifier (with principal angle)

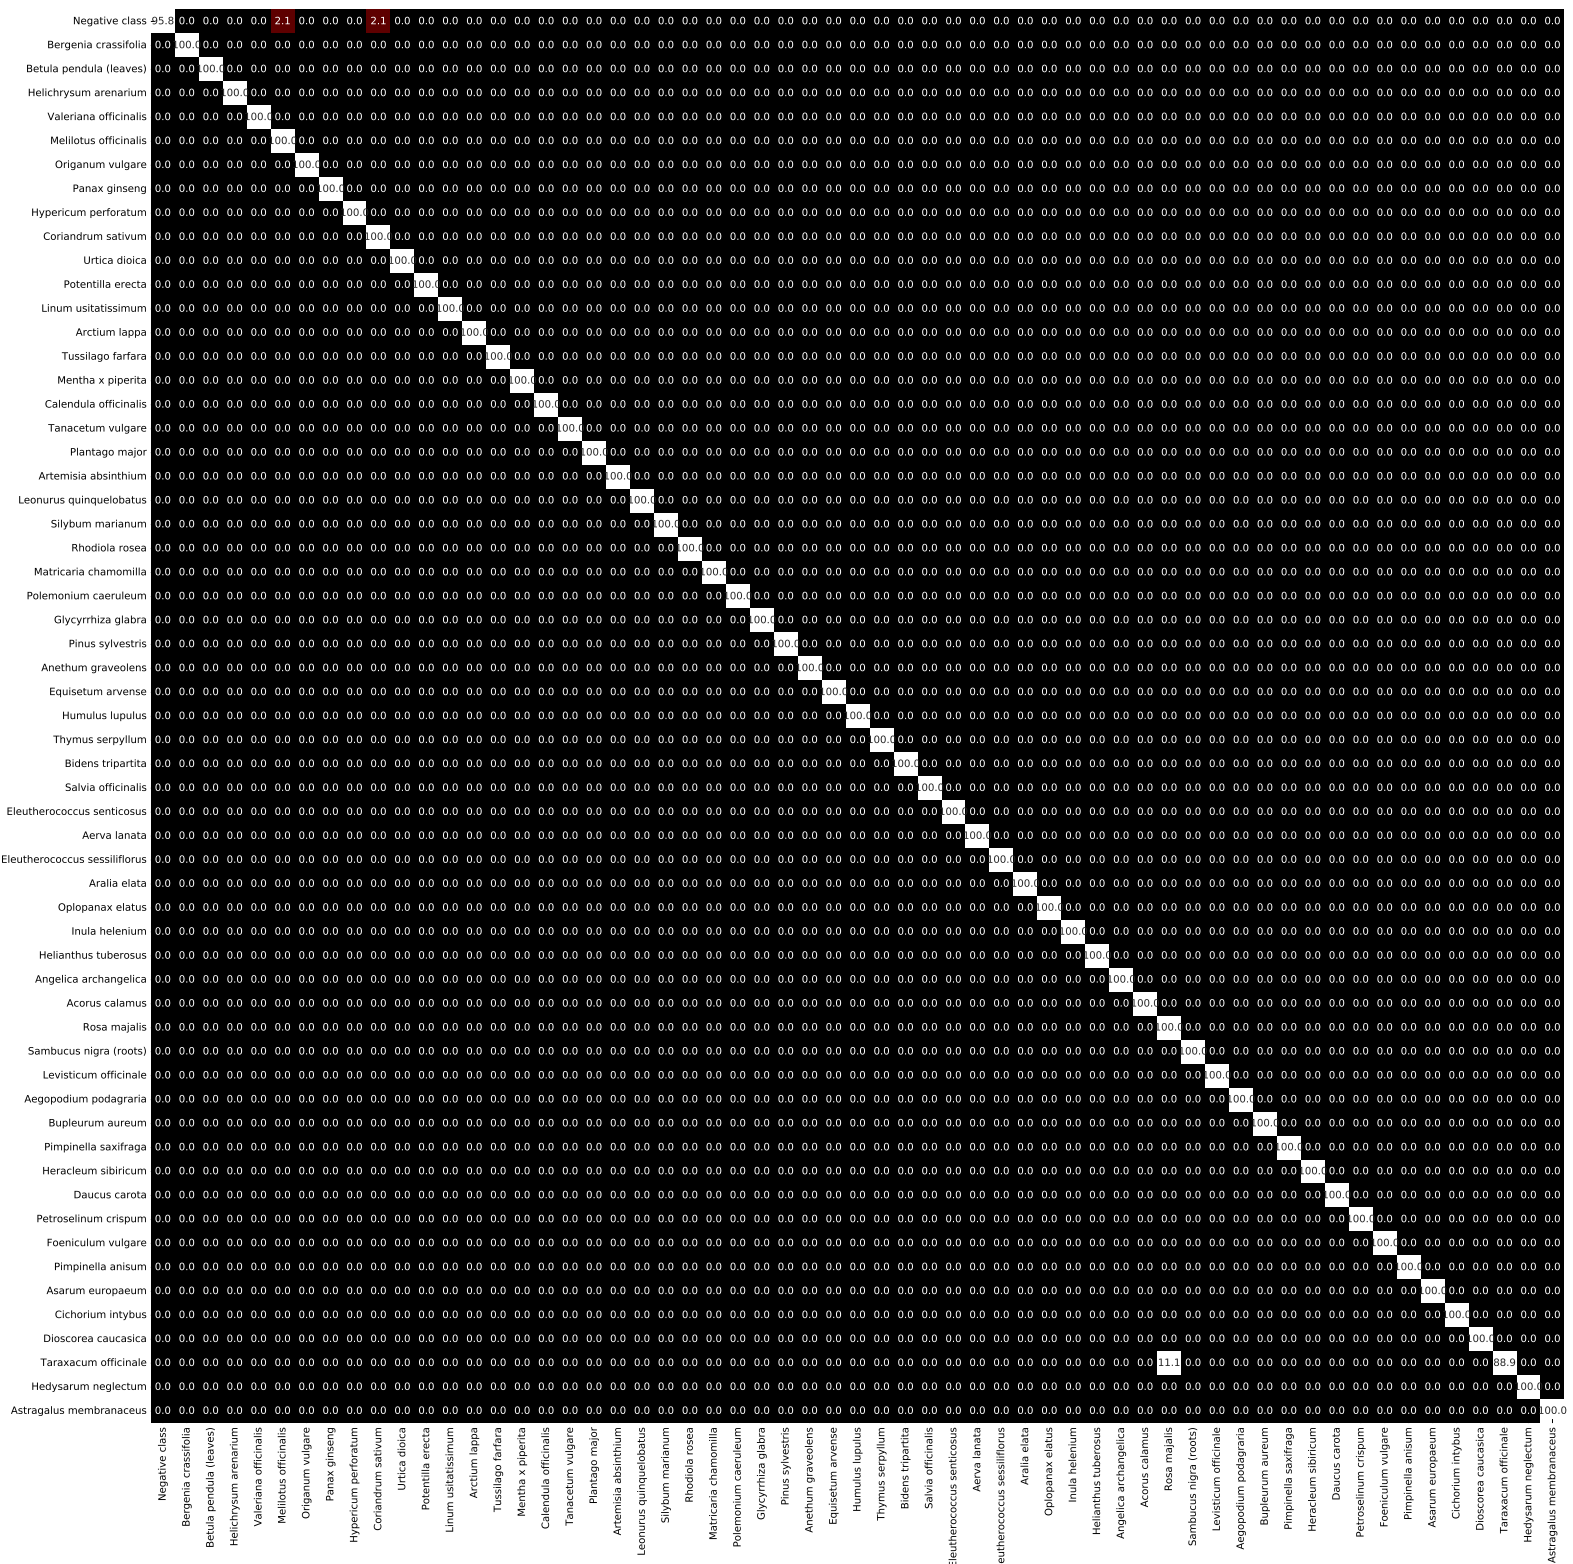

Figure S1.1(j): Median confusion matrix for sparse non-negative matrix factorization based classifier (with principal angle)

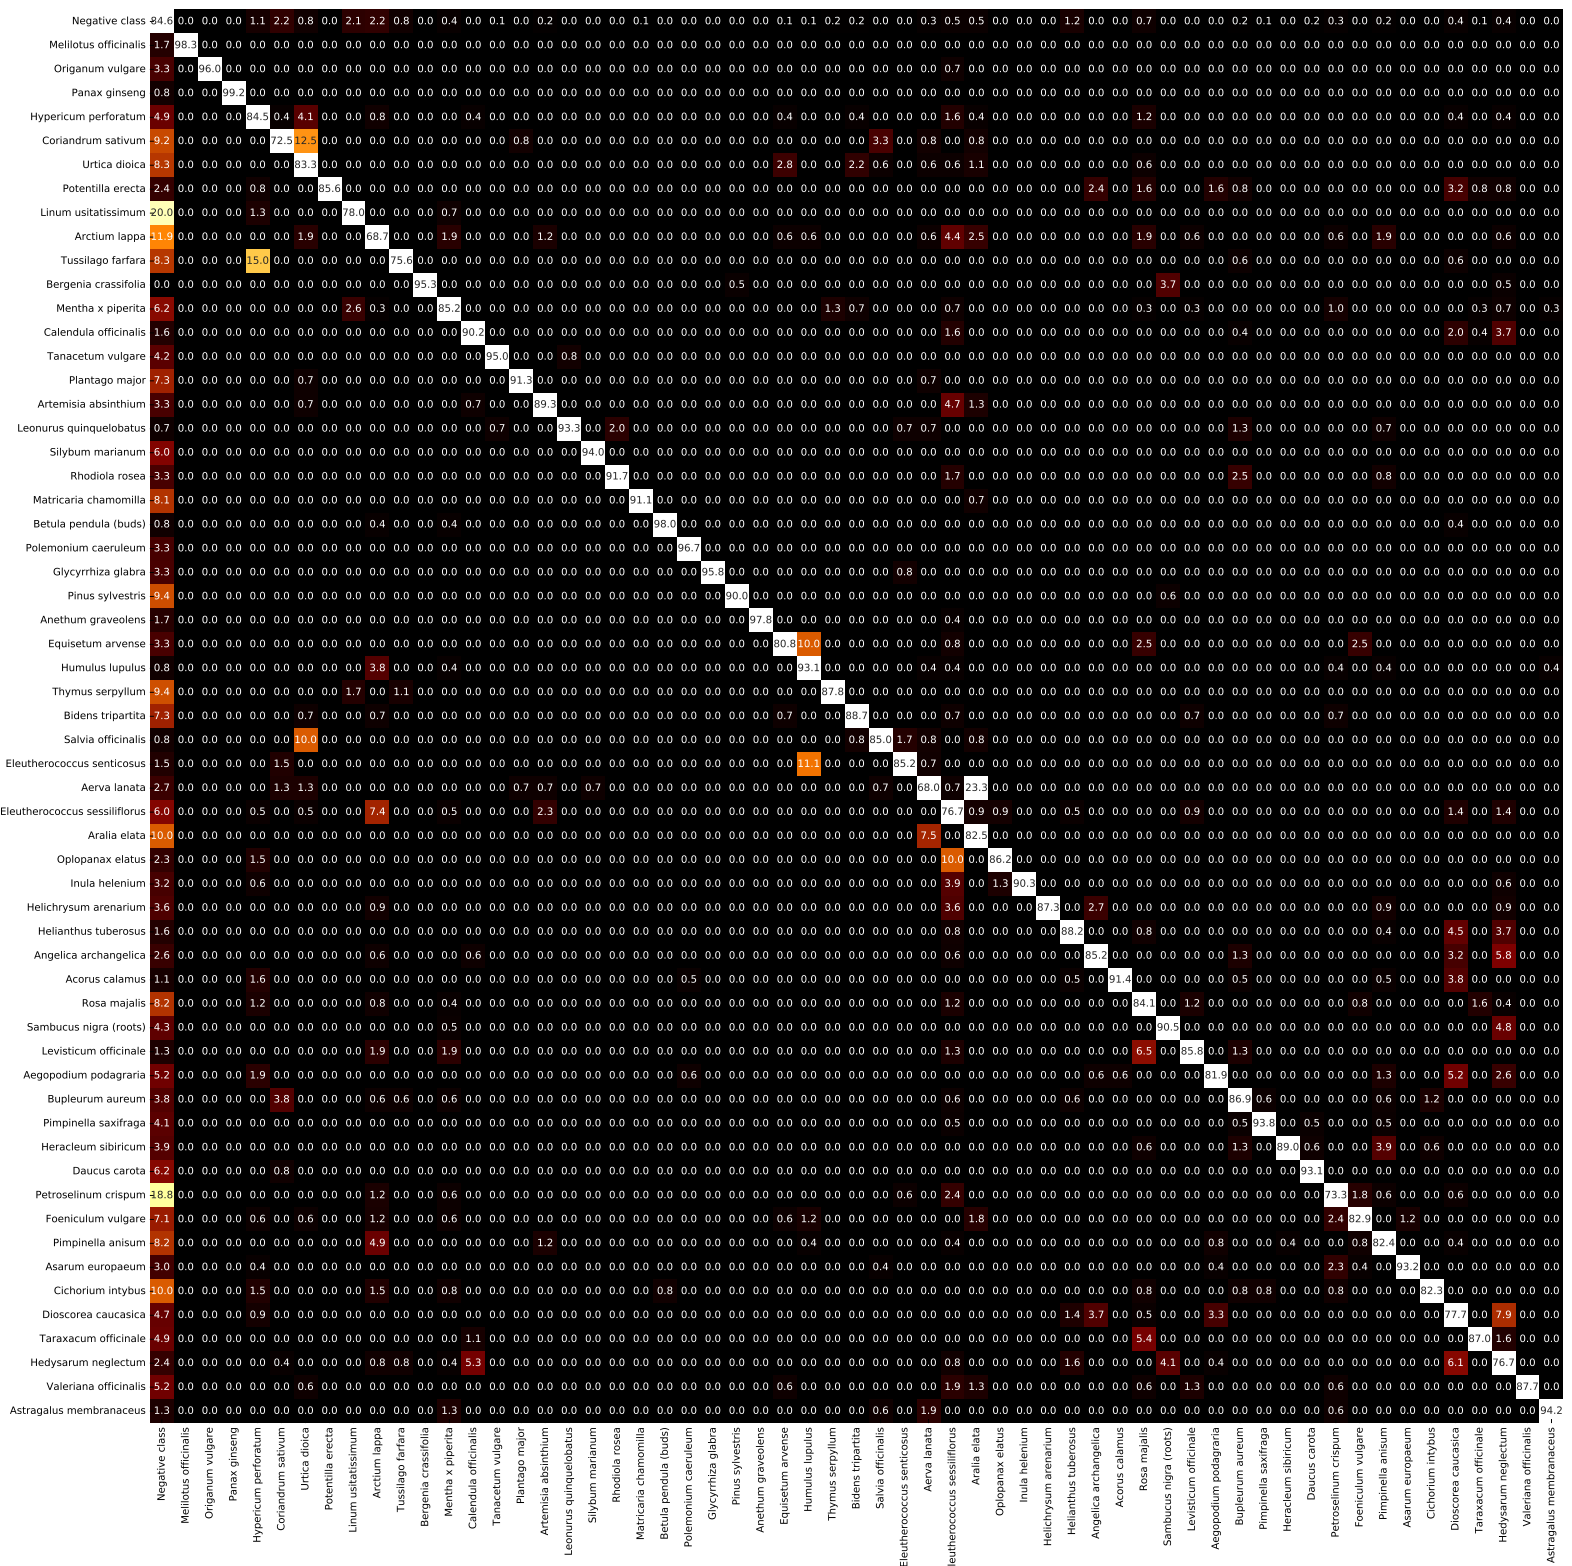

Figure S1.1(k): Mean confusion matrix for Hybrid Bayesian Network-based classifier trained on autoencoded feature space







## 2 Top5 predictions

Top5 prediction results for each sample of a class (inside each fold) were extracted and pooled together. Top5 frequent results from this list were selected and this top5s were then pooled from all 25 parts of CV (5 repetitions of 5 folds). Resulting top5 list was selected as “neighbors” for that class. Columns: true labels; rows: “neighbors”.

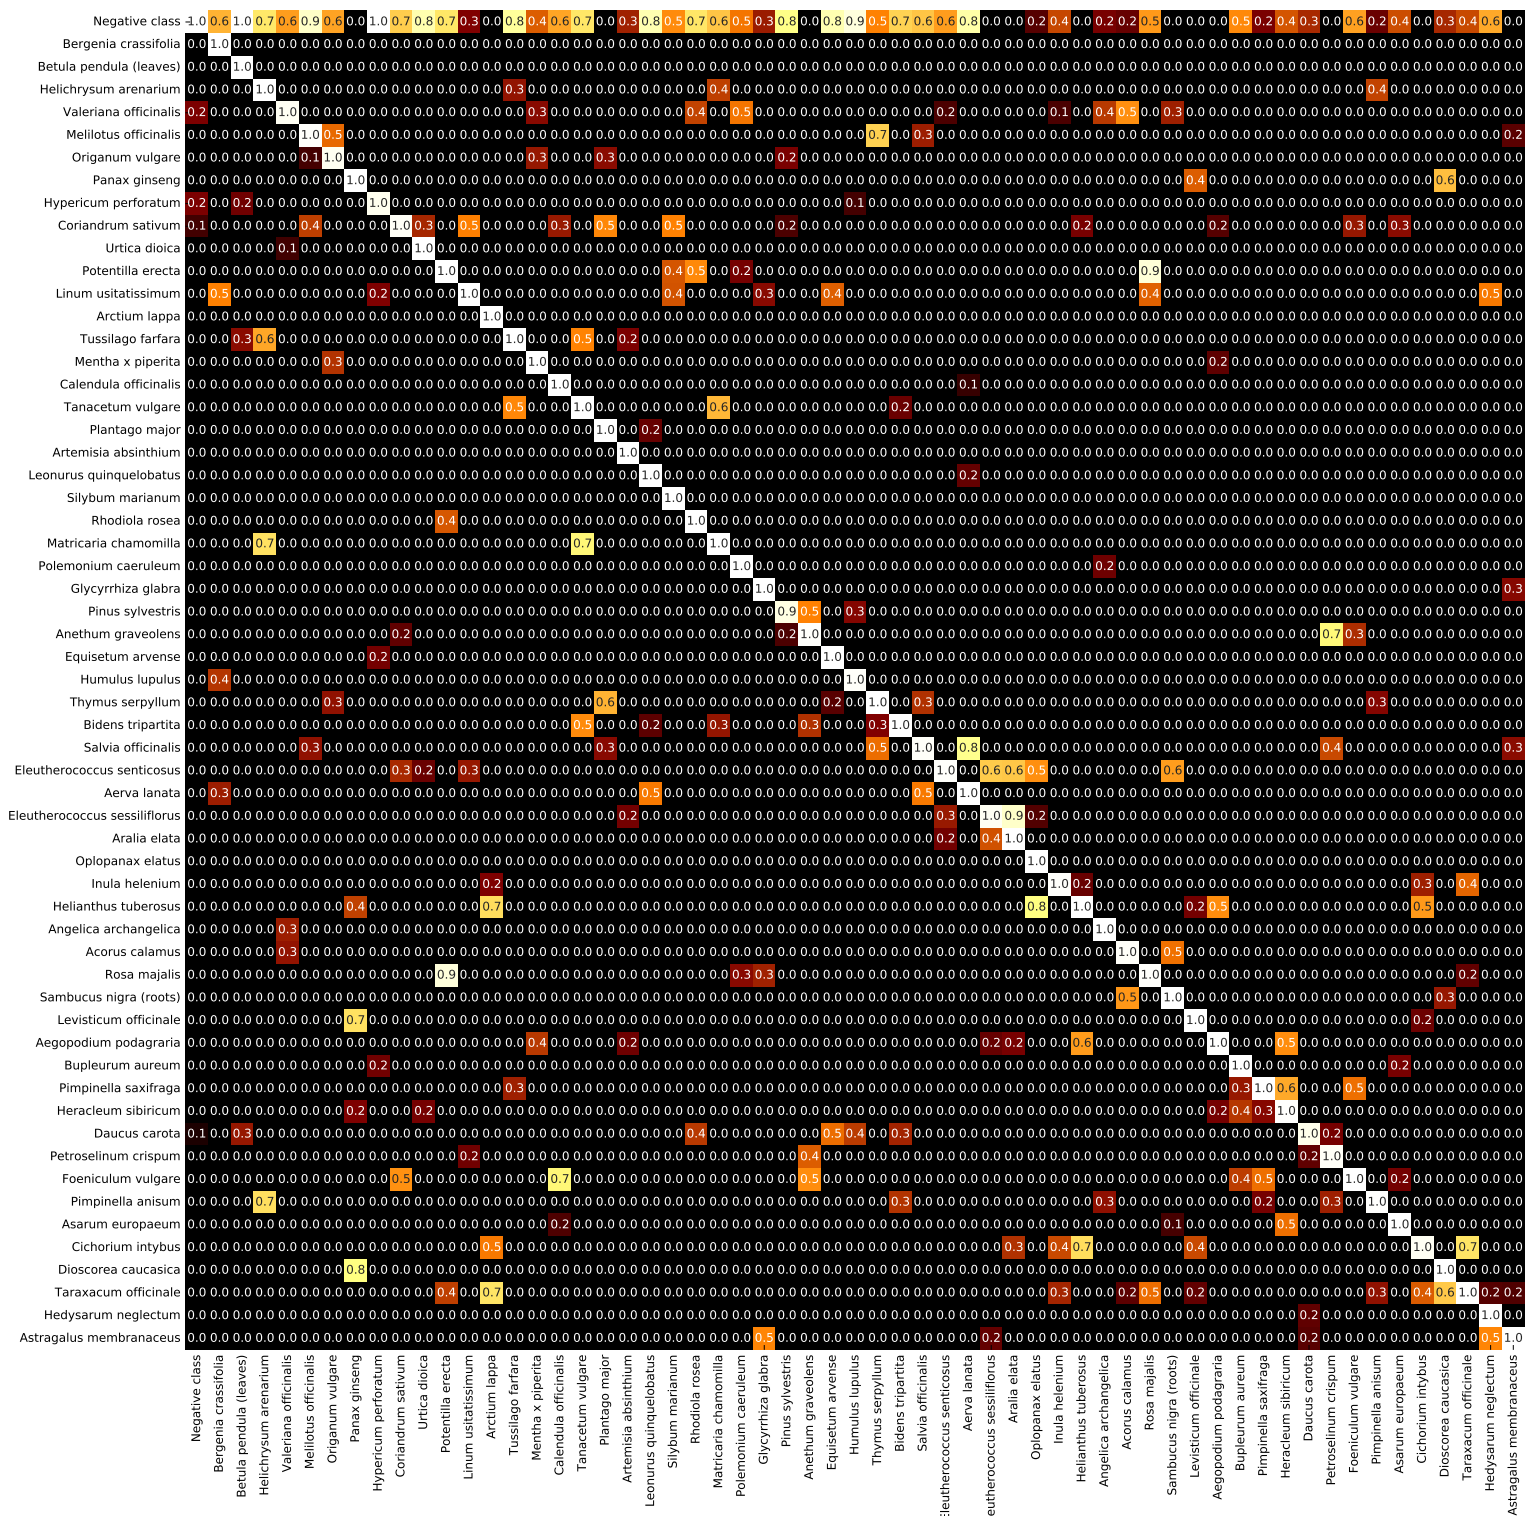

Figure S1.2(a): Logistic regression on features encoded by autoencoder



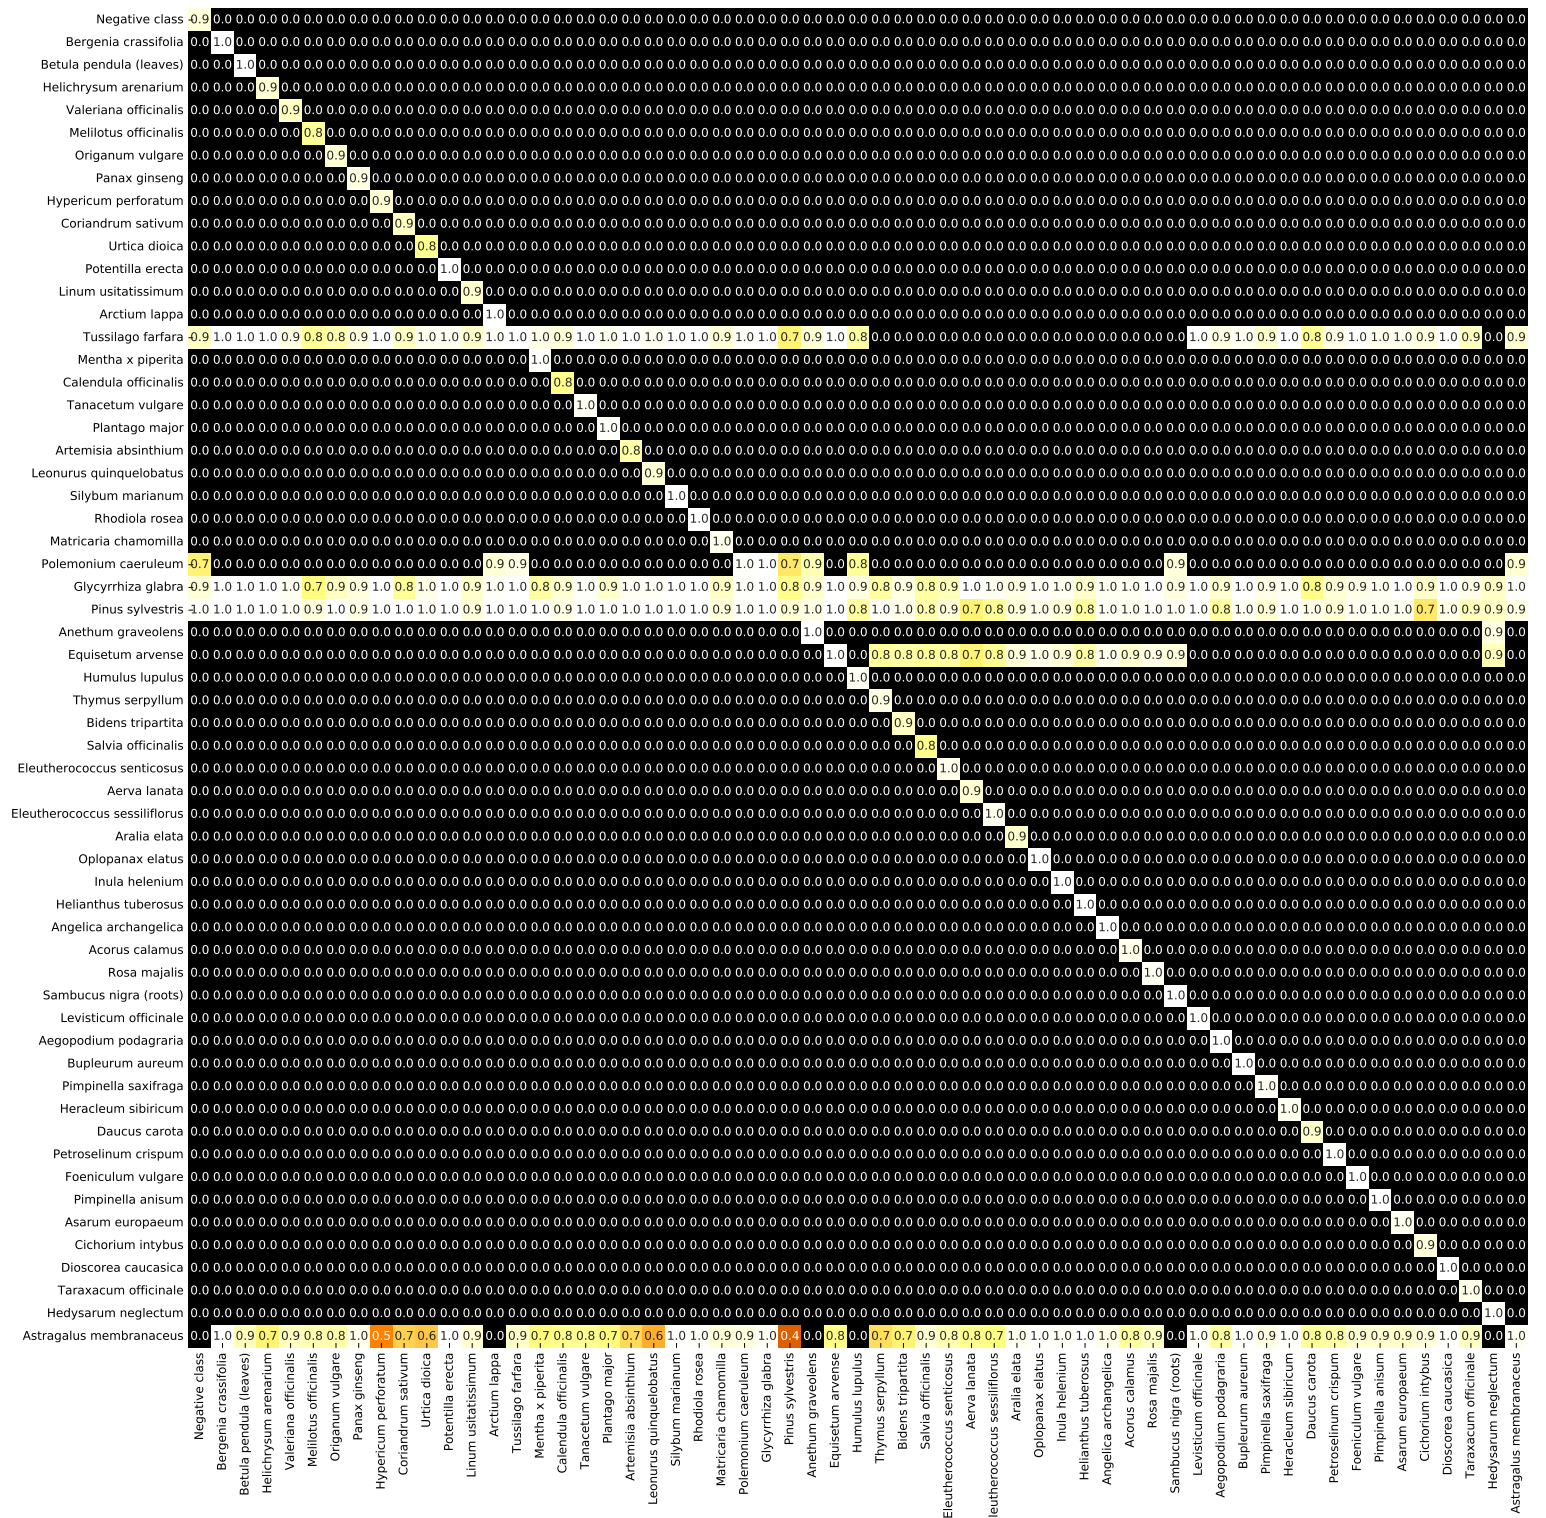

Figure S1.2(c): Large discrete Bayesian Network on binarized features



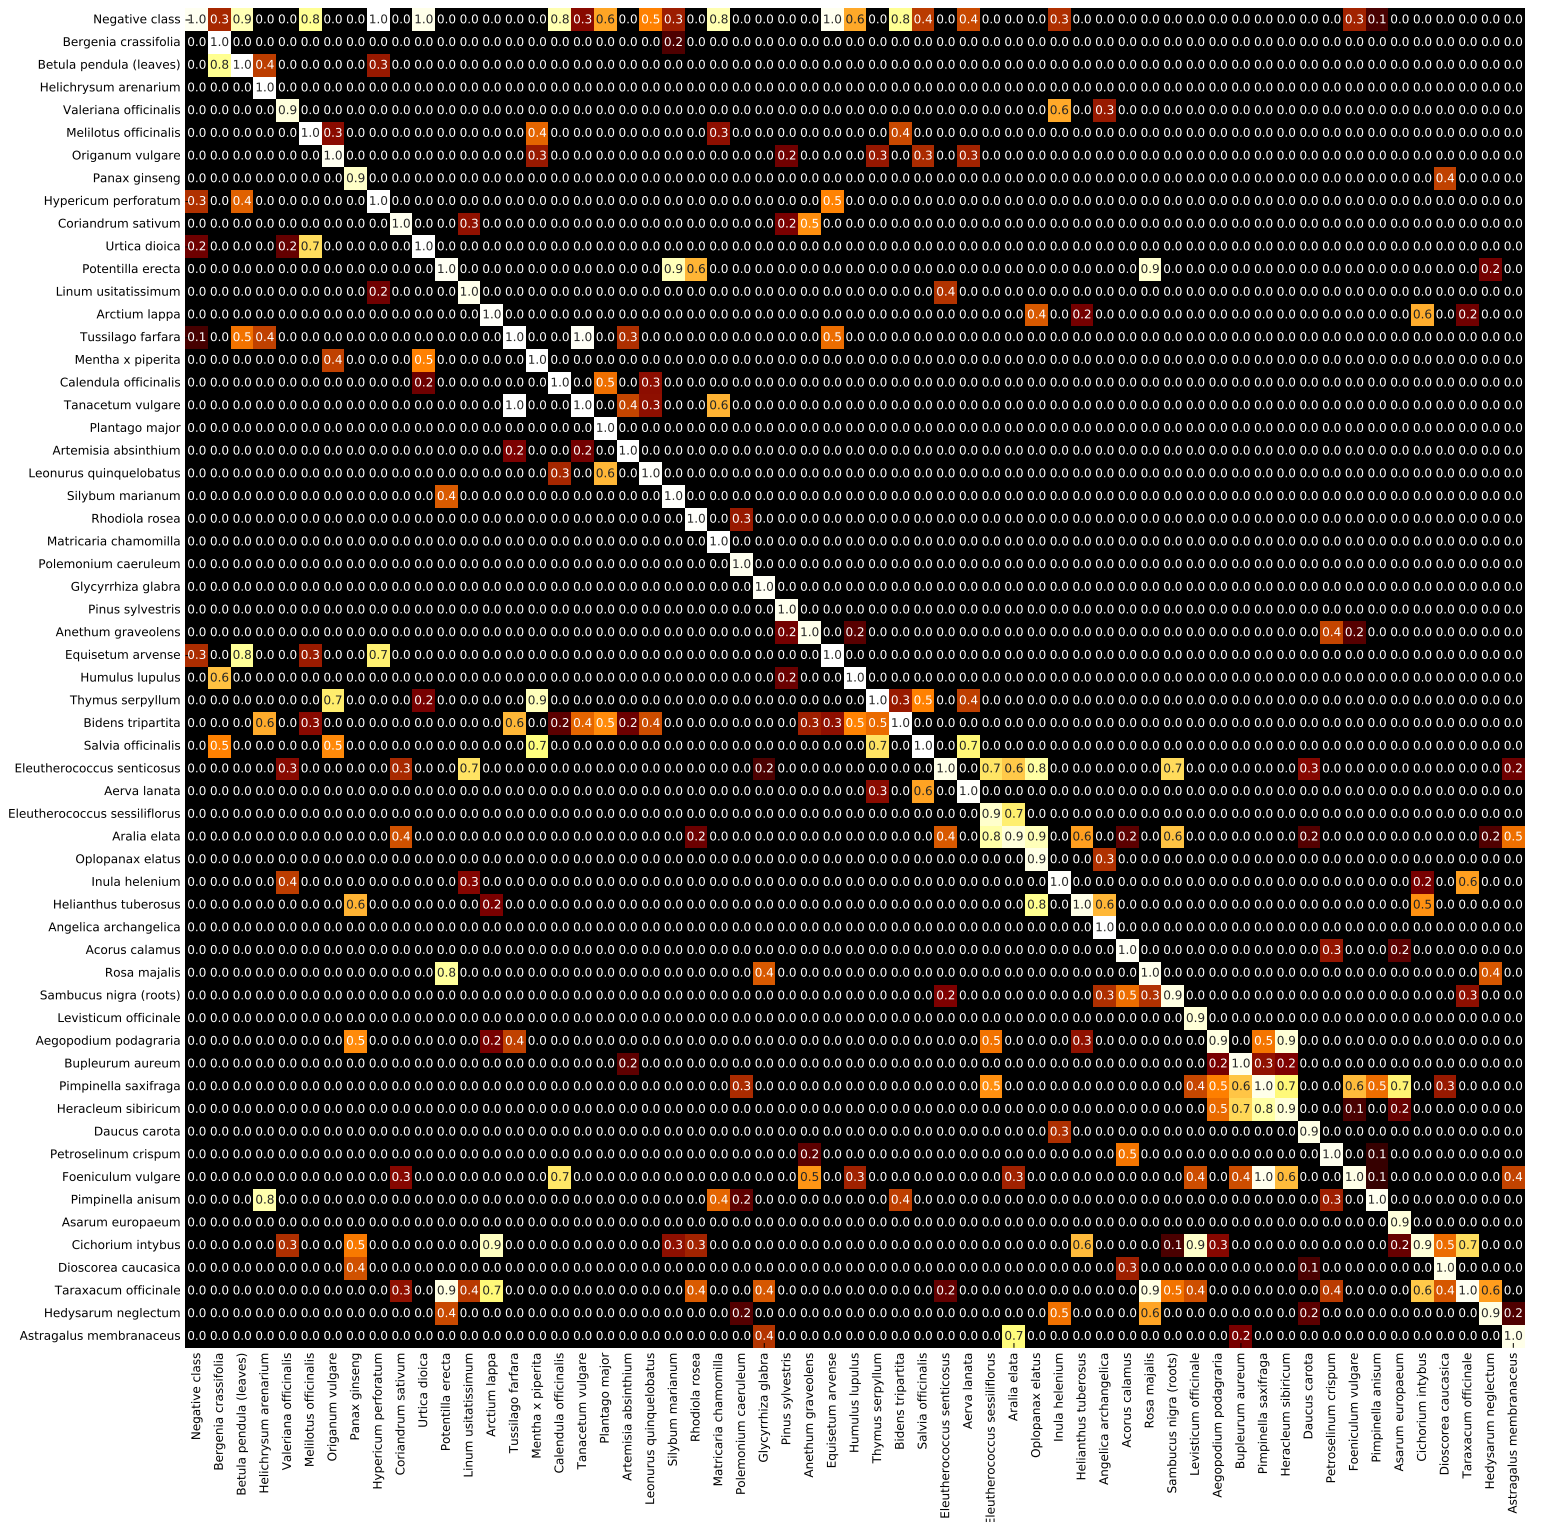

Figure S1.2(d): Sparse NMF classifier



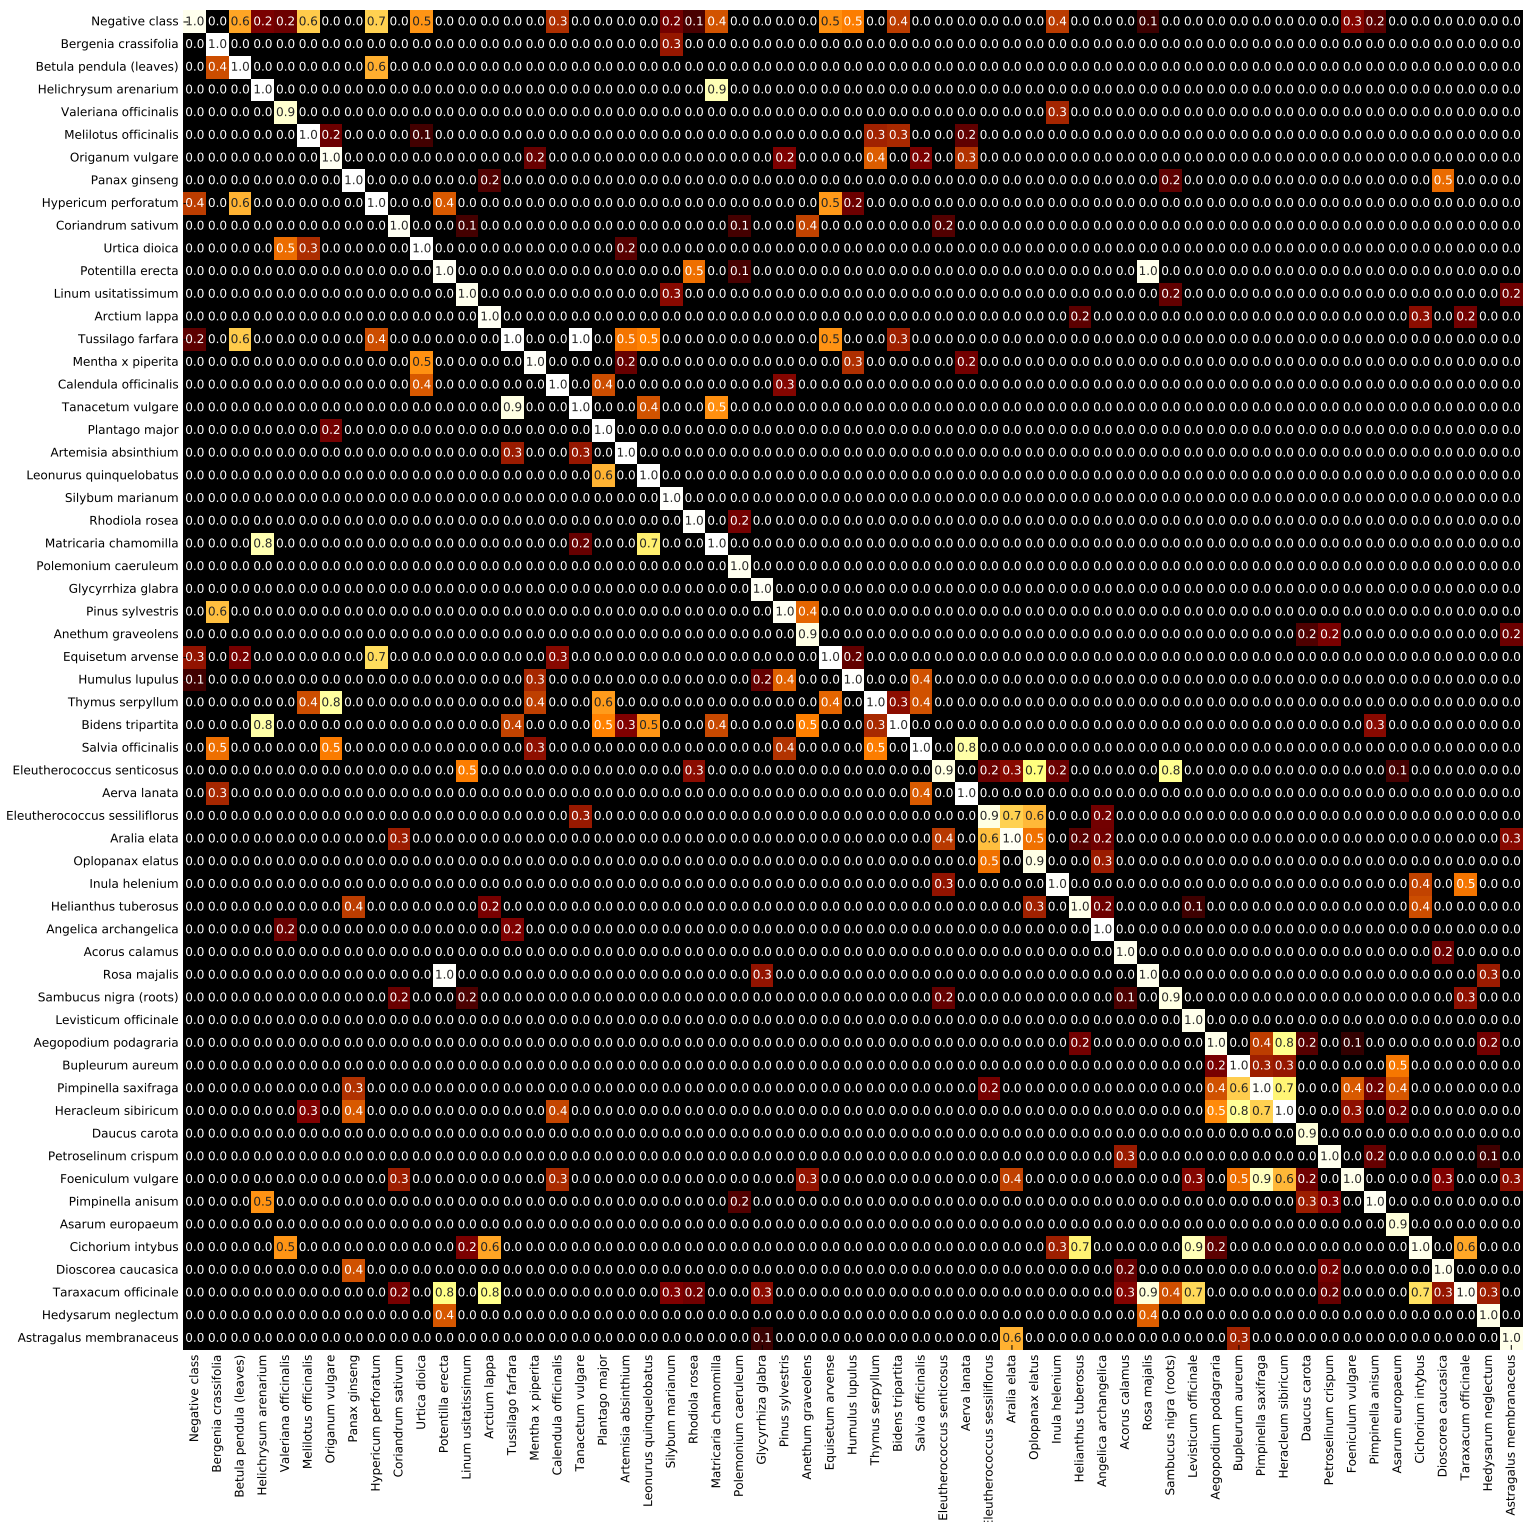

Figure S1.2(e): Sparse NTD classifier

### 3 Hierarchical clustering analysis (HCA)

HCA has been performed with hierarchical agglomerative clustering algorithm. Two variants of analysis have been performed: (1) clustering of mean samples for each of 76 classes (74 species); (2) clustering of all samples.

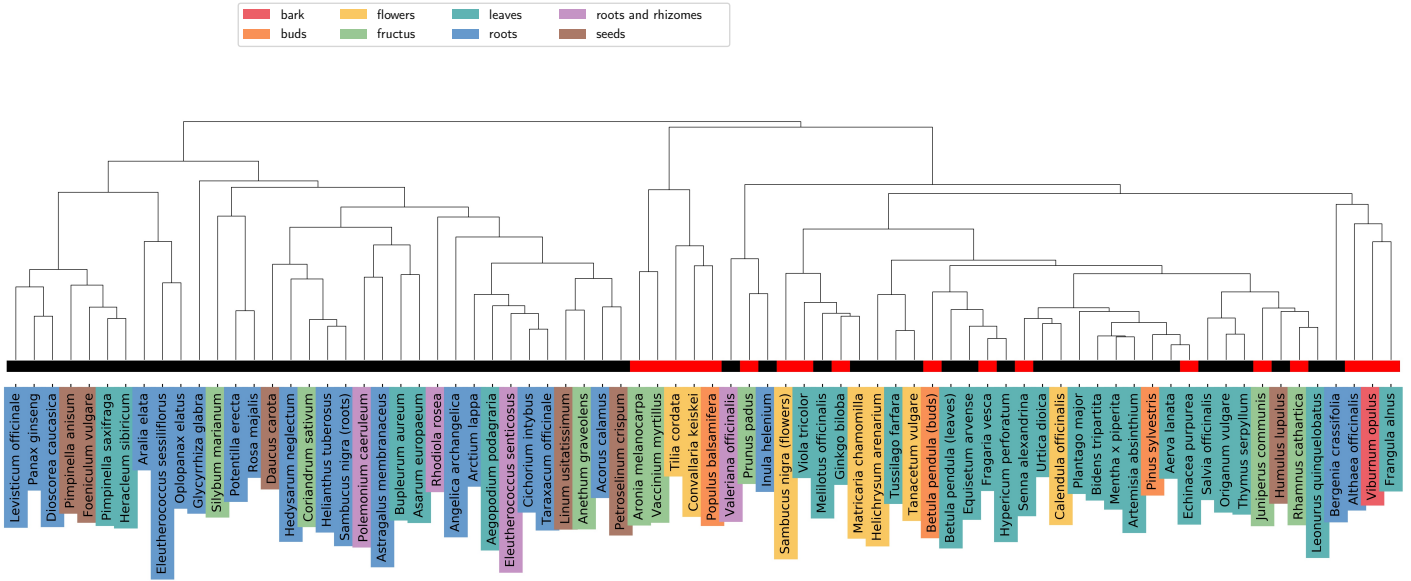

Figure S1.3(a): HCA of mean samples in the original feature space (linkage: complete, metric: correlation)

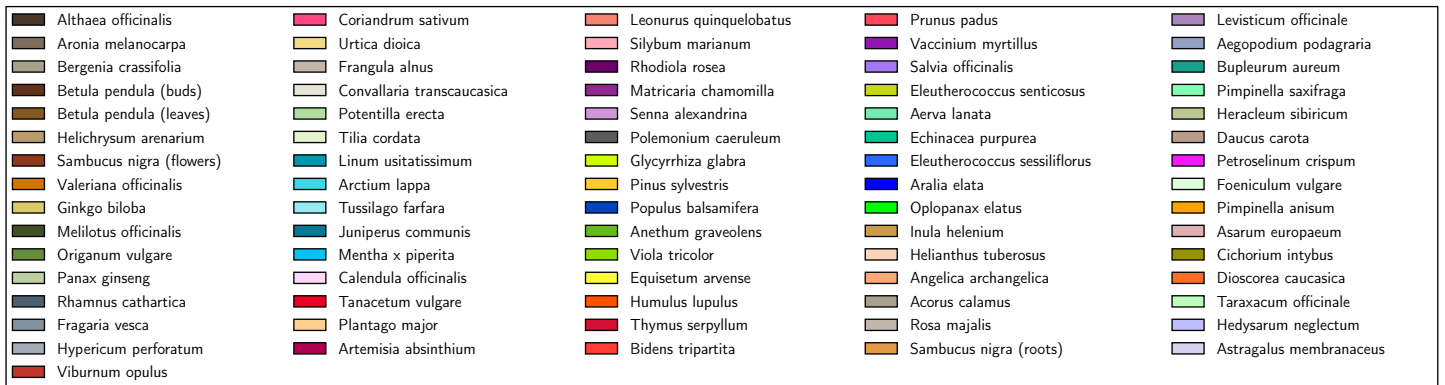

Figure S1.3(b): Colour codes for 76 classes

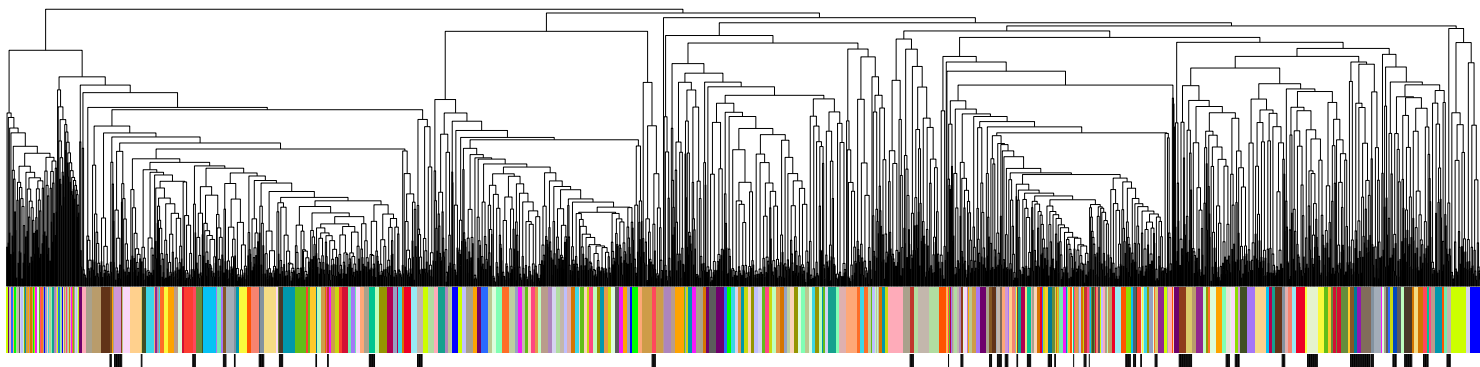

Figure S1.3(c): HCA of all samples in the original feature space (linkage: weighted, metric: euclidean); black vertical lines indicate samples from the negative class

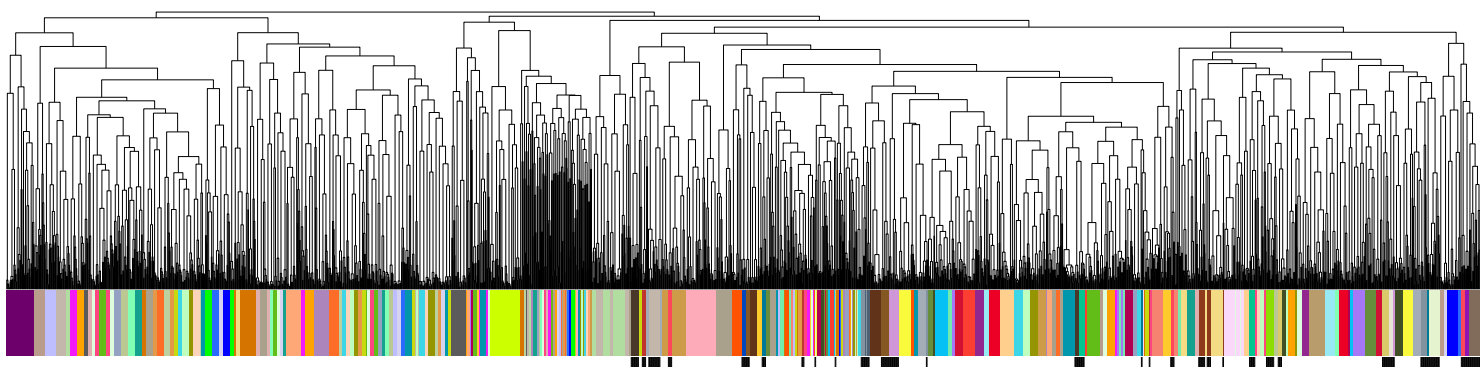

Figure S1.3(d): HCA of whole samples in the autoencoded feature space (linkage: weighted, metric: euclidean); black vertical lines indicate samples from the negative class

## 4 Sparse non-negative components

Components obtained after sparse non-negative matrix factorization (SNMF) and sparse non-negative Tucker decomposition (SNTD). On Figures S1.4(a), S1.4(b) first three components extracted by SNMF (and then splitted into positive and negative polarity parts) and SNTD algorithms are displayed. The following criteria was used to select three components:

$$\min_{i=1,r;i \notin \Omega} \left( \frac{1}{n_c - 1} \sum_{j \neq l} |B[j, i]| \right) - \log(|A[1, i]| + \varepsilon), \quad (1)$$

where  $\Omega$  is a set of already selected components,  $B \in \mathbb{R}^{n_c-1 \times r_l}$  - medians (taken by sample axis) of m/z-wise correlation matrix between components for current class  $l$  and samples drawn from other classes, and  $A \in \mathbb{R}^{1 \times r_l}$  is a vector of sample-wise medians of correlation matrix between components of current class  $l$  and samples drawn from current class,  $n_c$  - summarized number of classes.

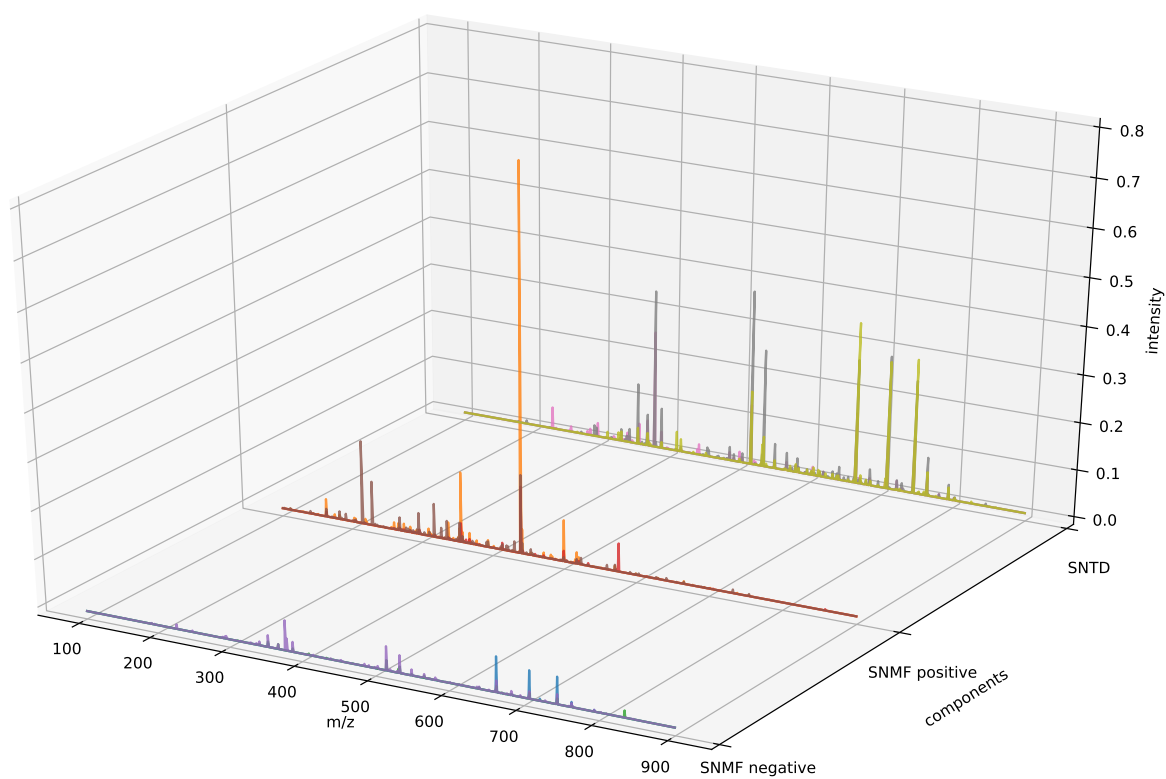

Figure S1.4(a): *Aralia elata*. Colours indicate separate components.

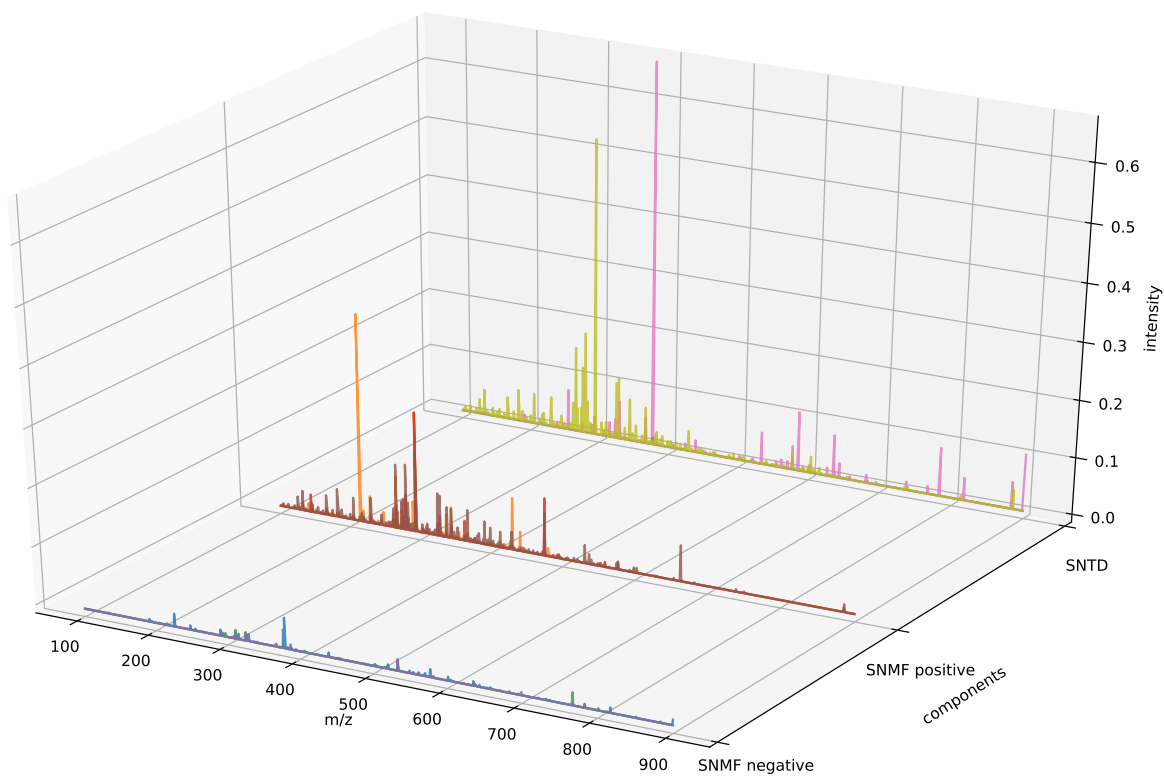

Figure S1.4(b): *Dioscorea caucasica*. Colours indicate separate components.



## 5 Autoencoder: structure, t-SNE plots and selection of last layer size

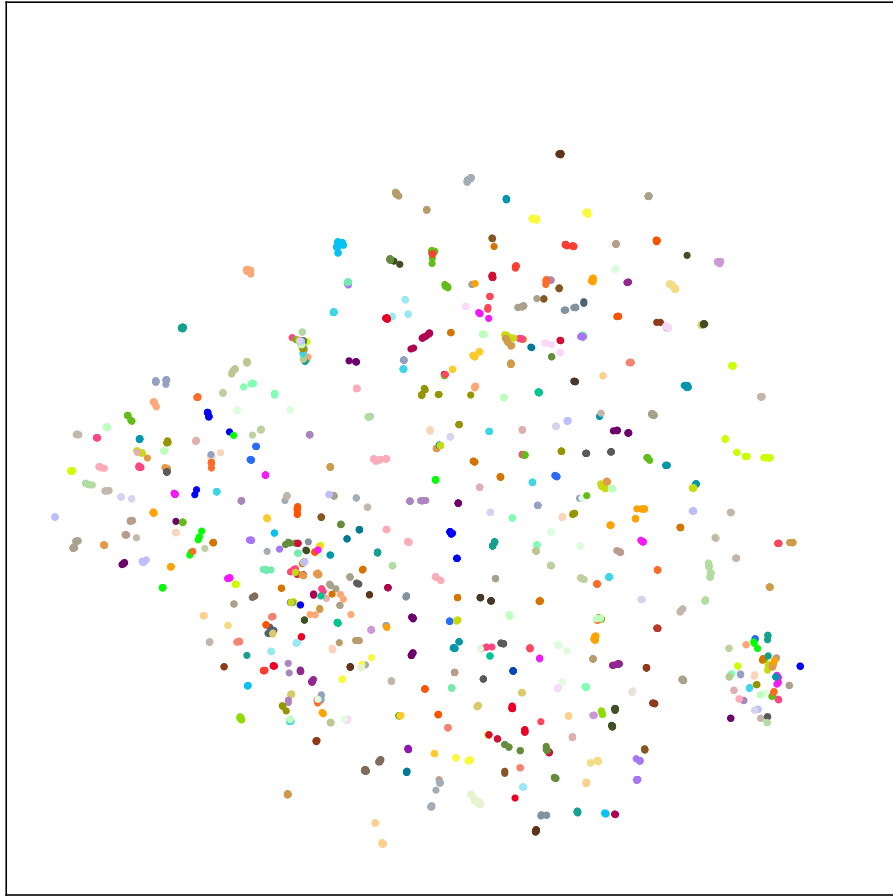

Figure S1.5(a): t-SNE plot for the main dataset with original feature space (1600 variables). Colour codes are the same as in Figure S1.3(b). Perplexity=10.

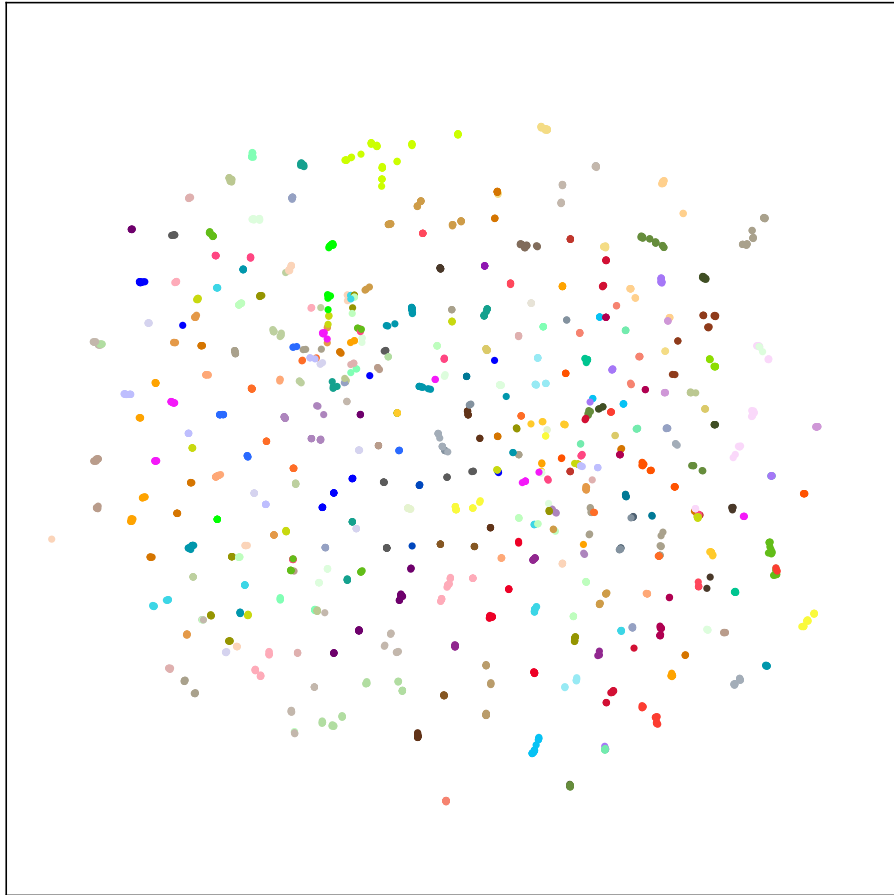

Figure S1.5(b): t-SNE plot for the main dataset with autoencoded feature space (25 variables). Colour codes are the same as in Figure S1.3(b). Perplexity=10.

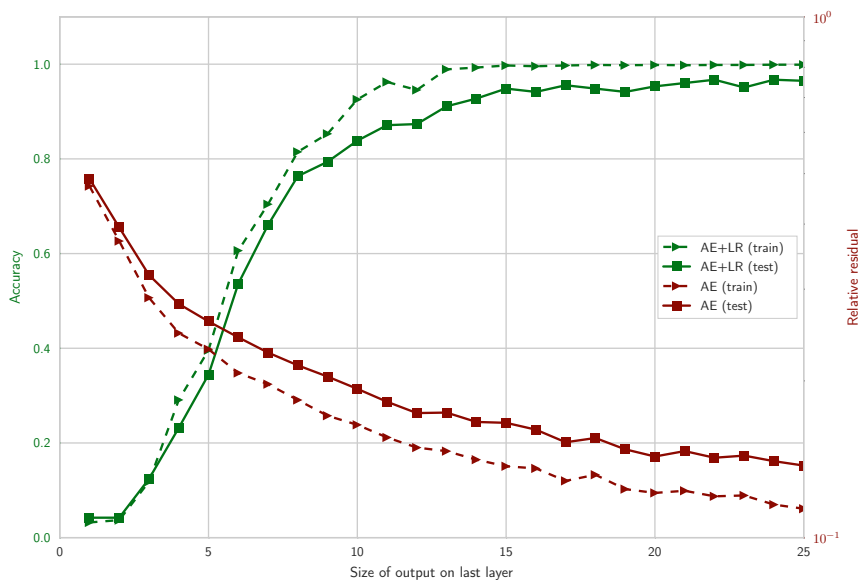

Figure S1.5(c): Accuracy on train/test1 parts of the dataset on 5-fold CV (green lines) and median of relative residual error among samples (red lines) depending on last layer size

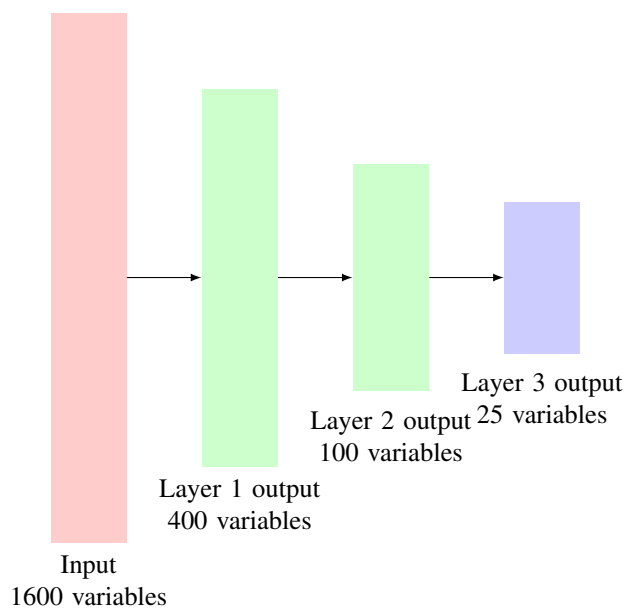

Figure S1.5(d): Final structure of autoencoder's encoding part

## 6 Dataset

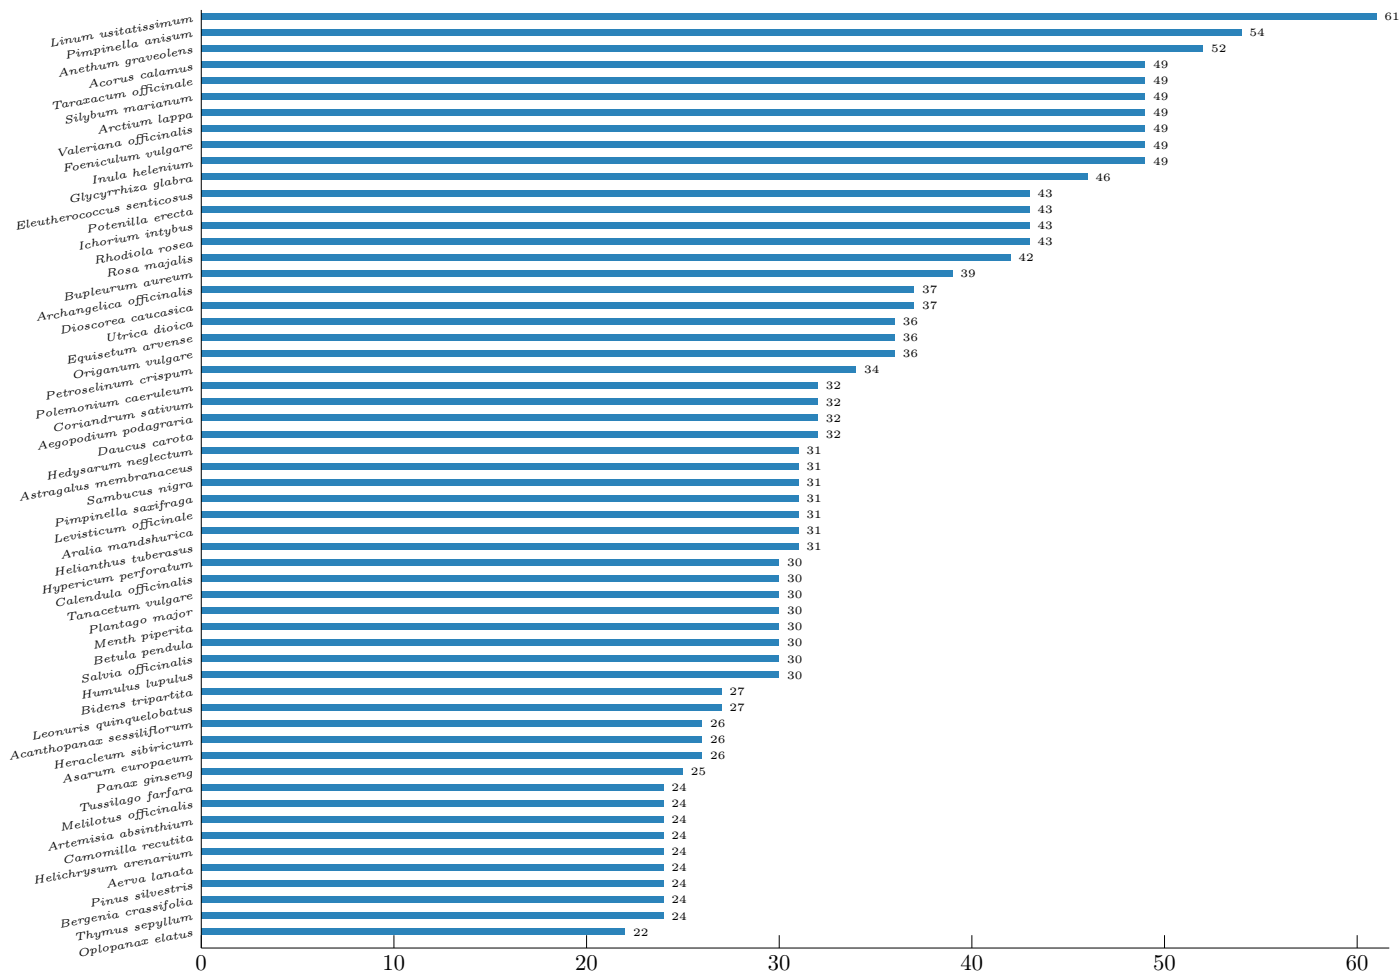

Figure S1.6(a): Dataset composition by plant species. Only 58 species with 20 or more available chromatograms are displayed.

Table S1.6(a): Plant species used in experiment and corresponding class labels. Corresponding file in computer readable format is available at Github repository <https://github.com/kharyuk/chemfin-plasp> as data/species.csv .

| Class | Plant species                  | Organ              | Class | Plant species                        | Organ              |
|-------|--------------------------------|--------------------|-------|--------------------------------------|--------------------|
| 1     | <i>Althaea officinalis</i>     | roots              | 41    | <i>Glycyrrhiza glabra</i>            | roots              |
| 2     | <i>Aronia melanocarpa</i>      | fructus            | 42    | <i>Pinus sylvestris</i>              | buds               |
| 3     | <i>Bergenia crassifolia</i>    | roots              | 43    | <i>Populus balsamifera</i>           | buds               |
| 4     | <i>Betula pendula</i>          | leaves             | 44    | <i>Anethum graveolens</i>            | fructus            |
| 5     | <i>Betula pendula</i>          | buds               | 45    | <i>Viola tricolor</i>                | leaves             |
| 6     | <i>Helichrysum arenarium</i>   | flowers            | 46    | <i>Equisetum arvense</i>             | leaves             |
| 7     | <i>Sambucus nigra</i>          | flowers            | 47    | <i>Humulus lupulus</i>               | seeds              |
| 8     | <i>Valeriana officinalis</i>   | roots,<br>rhizomes | 48    | <i>Thymus serpyllum</i>              | leaves             |
| 9     | <i>Ginkgo biloba</i>           | leaves             | 49    | <i>Bidens tripartita</i>             | leaves             |
| 10    | <i>Melilotus officinalis</i>   | leaves             | 50    | <i>Prunus padus</i>                  | fructus            |
| 11    | <i>Origanum vulgare</i>        | leaves             | 51    | <i>Vaccinium myrtillus</i>           | fructus            |
| 12    | <i>Panax ginseng</i>           | roots              | 52    | <i>Salvia officinalis</i>            | leaves             |
| 13    | <i>Rhamnus cathartica</i>      | fructus            | 53    | <i>Eleutherococcus senticosus</i>    | roots,<br>rhizomes |
| 14    | <i>Fragaria vesca</i>          | leaves             | 54    | <i>Aerva lanata</i>                  | leaves             |
| 15    | <i>Hypericum perforatum</i>    | leaves             | 55    | <i>Echinacea purpurea</i>            | leaves             |
| 16    | <i>Viburnum opulus</i>         | bark               | 56    | <i>Eleutherococcus sessiliflorus</i> | roots              |
| 17    | <i>Coriandrum sativum</i>      | fructus            | 57    | <i>Aralia elata</i>                  | roots              |
| 18    | <i>Urtica dioica</i>           | leaves             | 58    | <i>Oplopanax elatus</i>              | roots              |
| 20    | <i>Frangula alnus</i>          | leaves             | 59    | <i>Inula helenium</i>                | roots              |
| 23    | <i>Convallaria keiskei</i>     | flowers            | 60    | <i>Helianthus tuberosus</i>          | roots              |
| 24    | <i>Potentilla erecta</i>       | roots              | 61    | <i>Angelica archangelica</i>         | roots              |
| 25    | <i>Tilia cordata</i>           | flowers            | 62    | <i>Acorus calamus</i>                | roots              |
| 26    | <i>Linum usitatissimum</i>     | seeds              | 63    | <i>Rosa majalis</i>                  | roots              |
| 27    | <i>Arctium lappa</i>           | roots              | 64    | <i>Sambucus nigra</i>                | roots              |
| 28    | <i>Tussilago farfara</i>       | leaves             | 65    | <i>Levisticum officinale</i>         | roots              |
| 29    | <i>Juniperus communis</i>      | fructus            | 66    | <i>Aegopodium podagraria</i>         | leaves             |
| 30    | <i>Mentha x piperita</i>       | leaves             | 67    | <i>Bupleurum aureum</i>              | leaves             |
| 31    | <i>Calendula officinalis</i>   | flowers            | 68    | <i>Pimpinella saxifraga</i>          | leaves             |
| 32    | <i>Tanacetum vulgare</i>       | flowers            | 69    | <i>Heracleum sibiricum</i>           | leaves             |
| 33    | <i>Plantago major</i>          | leaves             | 70    | <i>Daucus carota</i>                 | seeds              |
| 34    | <i>Artemisia absinthium</i>    | leaves             | 71    | <i>Petroselinum crispum</i>          | seeds              |
| 35    | <i>Leonurus quinquelobatus</i> | leaves             | 72    | <i>Foeniculum vulgare</i>            | seeds              |
| 36    | <i>Silybum marianum</i>        | fructus            | 73    | <i>Pimpinella anisum</i>             | seeds              |
| 37    | <i>Rhodiola rosea</i>          | roots,<br>rhizomes | 75    | <i>Asarum europaeum</i>              | leaves             |
| 38    | <i>Matricaria chamomilla</i>   | flowers            | 76    | <i>Cichorium intybus</i>             | roots              |
| 39    | <i>Senna alexandrina</i>       | leaves             | 77    | <i>Dioscorea caucasica</i>           | roots              |
| 40    | <i>Polemonium caeruleum</i>    | roots,<br>rhizomes | 78    | <i>Taraxacum officinale</i>          | roots              |
|       |                                |                    | 79    | <i>Hedysarum neglectum</i>           | roots              |
|       |                                |                    | 80    | <i>Astragalus membranaceus</i>       | roots              |



## 7 Confusion matrices for prediction of plant parts

In this section we provide confusion matrices measured on test1 part as medians of 5 times repeated 5-fold cross validation (25 runs in total). Columns: predicted labels; rows: true labels.

|                    |      |      |         |         |        |       |                    |       |
|--------------------|------|------|---------|---------|--------|-------|--------------------|-------|
| bark -             | 1.00 | 0.00 | 0.00    | 0.00    | 0.00   | 0.00  | 0.00               | 0.00  |
| buds               | 0.00 | 0.90 | 0.00    | 0.10    | 0.00   | 0.00  | 0.00               | 0.00  |
| flowers            | 0.00 | 0.00 | 0.90    | 0.00    | 0.10   | 0.00  | 0.00               | 0.00  |
| fructus            | 0.00 | 0.00 | 0.00    | 0.61    | 0.11   | 0.14  | 0.00               | 0.14  |
| leaves             | 0.00 | 0.00 | 0.01    | 0.01    | 0.93   | 0.02  | 0.01               | 0.01  |
| roots              | 0.00 | 0.00 | 0.00    | 0.01    | 0.02   | 0.92  | 0.03               | 0.02  |
| roots,<br>rhizomes | 0.00 | 0.00 | 0.00    | 0.06    | 0.03   | 0.28  | 0.62               | 0.00  |
| seeds              | 0.00 | 0.00 | 0.00    | 0.10    | 0.12   | 0.04  | 0.00               | 0.73  |
|                    | bark | buds | flowers | fructus | leaves | roots | roots,<br>rhizomes | seeds |

Figure S1.7(a): Median confusion matrix for Logistic Regression trained on autoencoded feature space.

|                    |      |      |         |         |        |       |                    |       |
|--------------------|------|------|---------|---------|--------|-------|--------------------|-------|
| bark -             | 1.00 | 0.00 | 0.00    | 0.00    | 0.00   | 0.00  | 0.00               | 0.00  |
| buds               | 0.00 | 0.88 | 0.00    | 0.12    | 0.00   | 0.00  | 0.00               | 0.00  |
| flowers            | 0.00 | 0.00 | 0.86    | 0.00    | 0.14   | 0.00  | 0.00               | 0.00  |
| fructus            | 0.00 | 0.03 | 0.00    | 0.39    | 0.17   | 0.17  | 0.00               | 0.25  |
| leaves             | 0.00 | 0.01 | 0.04    | 0.01    | 0.86   | 0.06  | 0.01               | 0.01  |
| roots              | 0.00 | 0.00 | 0.00    | 0.03    | 0.07   | 0.86  | 0.03               | 0.01  |
| roots,<br>rhizomes | 0.00 | 0.00 | 0.00    | 0.06    | 0.06   | 0.25  | 0.62               | 0.00  |
| seeds              | 0.00 | 0.02 | 0.04    | 0.08    | 0.18   | 0.14  | 0.00               | 0.55  |
|                    | bark | buds | flowers | fructus | leaves | roots | roots,<br>rhizomes | seeds |

Figure S1.7(b): Median confusion matrix for Naive Bayes classifier trained on autoencoded feature space.

|                    |      |      |         |         |        |       |                    |       |
|--------------------|------|------|---------|---------|--------|-------|--------------------|-------|
| bark -             | 1.00 | 0.00 | 0.00    | 0.00    | 0.00   | 0.00  | 0.00               | 0.00  |
| buds               | 0.00 | 1.00 | 0.00    | 0.00    | 0.00   | 0.00  | 0.00               | 0.00  |
| flowers            | 0.00 | 0.00 | 0.83    | 0.00    | 0.17   | 0.00  | 0.00               | 0.00  |
| fructus            | 0.00 | 0.00 | 0.00    | 0.55    | 0.16   | 0.16  | 0.03               | 0.11  |
| leaves             | 0.00 | 0.01 | 0.05    | 0.02    | 0.83   | 0.05  | 0.01               | 0.03  |
| roots              | 0.00 | 0.00 | 0.00    | 0.02    | 0.04   | 0.86  | 0.04               | 0.04  |
| roots,<br>rhizomes | 0.00 | 0.00 | 0.00    | 0.03    | 0.03   | 0.35  | 0.55               | 0.03  |
| seeds              | 0.00 | 0.00 | 0.02    | 0.04    | 0.20   | 0.14  | 0.00               | 0.59  |
|                    | bark | buds | flowers | fructus | leaves | roots | roots,<br>rhizomes | seeds |

Figure S1.7(c): Median confusion matrix for Hybrid Bayesian Network trained on autoencoded feature space.

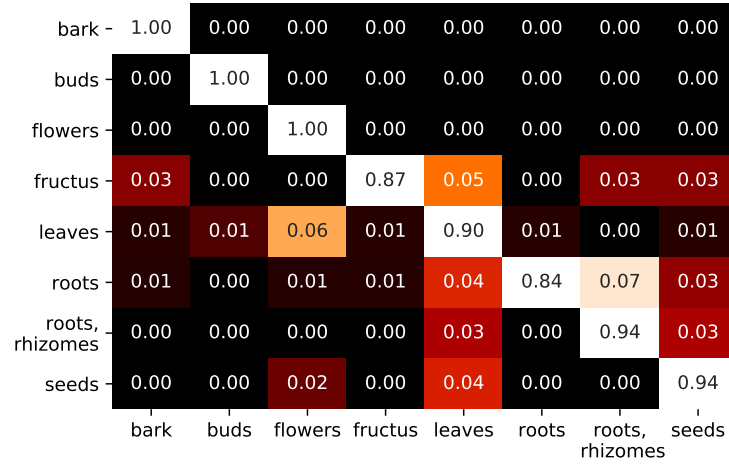

Figure S1.7(d): Median confusion matrix for classifier based on sparse non-negative Tucker decomposition.

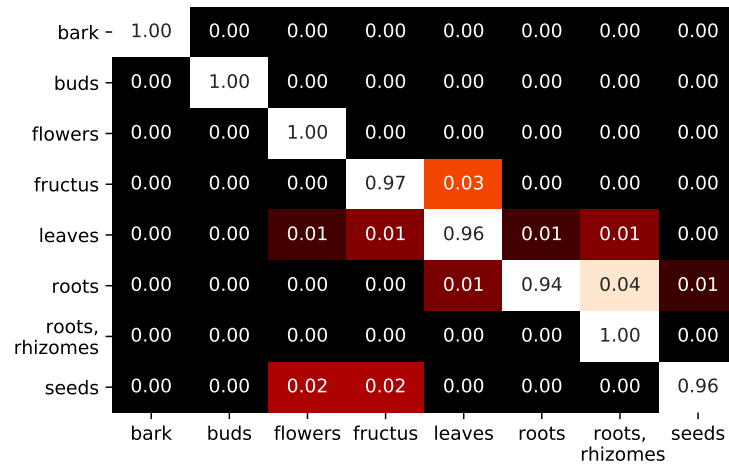

Figure S1.7(e): Median confusion matrix for classifier based on sparse non-negative matrix factorization.

## 8 Github repository structure.

| Directory | Description                            |
|-----------|----------------------------------------|
| data      | Directory with data (csv, sif, npz)    |
| models    | Directory for storing computed models  |
| notebook  | Computational experiments              |
| results   | Directory for storing computed results |
| src       | Python sources                         |

Table S1.8(a): Structure of chemfin-plasp repository (github, link: <https://github.com/kharyuk/chemfin-plasp>)
